1           **Immunological profiling of COVID-19 patients with pulmonary sequelae**

2  
3   **Authors:**

4   Jianghua Wu<sup>1,2,#</sup>, Lu Tang<sup>1,2,#</sup>, Yanling Ma<sup>3,#</sup>, Yu Li<sup>3,#</sup>, Dongmei Zhang<sup>3</sup>, Qian Li<sup>1,2</sup>,  
5   Heng Mei<sup>1,2,\*</sup>, Yu Hu<sup>1,2,\*</sup>

6   **Institutes:**

7   1 Institute of Hematology, Union Hospital, Tongji Medical College, Huazhong  
8   University of Science and Technology, Wuhan, 430022, China

9   2 Hubei clinical medical center of cell therapy for neoplastic disease, Wuhan,  
10   430022, China

11   3 Department of Respiratory and Critical Care Medicine, Union Hospital, Tongji  
12   Medical College, Huazhong University of Science and Technology, Wuhan, 430022,  
13   China

14  
15   Jianghua Wu, Lu Tang, Yanling Ma and Yu Li contributed equally to this article.

16  
17   **\*Corresponding Authors:**

18   Heng Mei, Institute of Hematology, Union Hospital, Tongji Medical College,  
19   Huazhong University of Science and Technology, No.1277 Jiefang Avenue, Wuhan  
20   430022, Hubei, China; Tel: +86-027-85726007; Fax: +86-027-85726387; E-mail:  
21   hmei@hust.edu.cn;

22   Yu Hu\*, Institute of Hematology, Union Hospital, Tongji Medical College, Huazhong  
23   University of Science and Technology, No.1277 Jiefang Avenue, Wuhan 430022,  
24   Hubei, China; Tel: +86-027-85726007; Fax: +86-027-85726387; E-mail:  
25   dr\_huyu@126.com.

26  
27  
28  
29  
30

31 **ABSTRACT**

32 Cellular immunity may be involved in organ damage and rehabilitation in patients  
33 with coronavirus disease 2019 (COVID-19). We aimed to delineate immunological  
34 features of COVID-19 patients with pulmonary sequelae (PS) one year after  
35 discharge. 50 COVID-19 survivors were recruited and classified according to  
36 radiological characteristics: 24 patients with PS and 26 patients without PS.  
37 Phenotypic and functional characteristics of immune cells were evaluated by  
38 multiparametric flow cytometry. Patients with PS had an increased proportion of  
39 natural killer (NK) cells and lower percentage of B cells compared to patients without  
40 PS. Phenotypic and functional features of T cells in patients with PS were  
41 predominated by the accumulation of CD4<sup>+</sup> T cells secreting IL-17A, short-lived  
42 effector-like CD8<sup>+</sup> T cells (CD27<sup>-</sup>CD62L<sup>-</sup>) and senescent T cells with excessive  
43 secretion of granzyme-B/perforin/IFN- $\gamma$ . NK cells were characterized by the  
44 excessive secretion of granzyme-B and perforin and the downregulation of NKP30  
45 and NKP46; highly activated NKT and  $\gamma\delta$  T cells exhibited NKP30 and TIM-3  
46 upregulation and NKB1 downregulation in patients with PS. However,  
47 immunosuppressive cells were comparable between the two groups. The  
48 interrelation of immune cells in COVID-19 was intrinsically identified, whereby T cells  
49 secreting IL-2, IL-4 and IL-17A were enriched among CD28<sup>+</sup> and CD57<sup>-</sup> cells and  
50 cells secreting perforin/granzyme-B/IFN- $\gamma$ /TNF- $\alpha$  expressed markers of terminal  
51 differentiation. CD57<sup>+</sup>NK cells, CD4<sup>+</sup>perforin<sup>+</sup> T cells and CD8<sup>+</sup>CD27<sup>+</sup>CD62L<sup>+</sup> T  
52 cells were identified as the independent predictors for residual lesions. Overall, our  
53 findings unveil the profound imbalance of immune landscape that may correlate with  
54 organ damage and rehabilitation in COVID-19.

55 **IMPORTANCE:** A considerable proportion of COVID-19 survivors have residual lung  
56 lesions, such as ground glass opacity and fiber streak shadow. To determine the  
57 relationship between host immunity and residual lung lesions, we performed an  
58 extensive analysis of immune responses in convalescent patients with COVID-19  
59 one year after discharge. We found significant differences in immunological  
60 characteristics between patients with pulmonary sequelae and patients without

61 pulmonary sequelae one year after discharge. Our study highlights the profound  
62 imbalance of immune landscape in the COVID-19 patients with pulmonary sequelae,  
63 characterized by the robust activation of cytotoxic T cells, NK cells and  $\gamma\delta$  T cells as  
64 well as the deficiencies of immunosuppressive cells. Importantly, CD57+NK cells,  
65 CD4+perforin+ T cells and CD8+CD27+CD62L+ T cells were identified as the  
66 independent predictors for residual lesions.

67 **KEYWORDS:** COVID-19; Cellular immunity; Pulmonary sequelae;

68

## 69 INTRODUCTION

70 As of early May 2021, more than 150 million people have developed coronavirus  
71 disease (COVID-19), a pandemic that has killed approximately 3 million people.  
72 Caused by acute respiratory syndrome coronavirus 2 (SARS-CoV-2), COVID-19  
73 exhibited a highly variable clinical course, ranging from a high proportion of  
74 asymptomatic and mild infections to severe and fatal disease(1). With the help of  
75 interventions and immediate medical support, most patients have recovered.  
76 Nevertheless, a considerable proportion of survivors have unresolved health issues,  
77 such as pulmonary fibrosis and gas diffusion impairment(2). Thus, understanding the  
78 clinical and immunological features of convalescent individuals is critically important  
79 to elucidate the immunopathogenesis of COVID-19 and facilitate the development of  
80 effective immune interventions.

81 Early infection with SARS-CoV-2 can induce efficient innate immunity, followed  
82 by an adaptive immune response to control the virus(3). Such synchronized  
83 interaction between innate and adaptive immunity exquisitely mediates both viral  
84 control and host toxicity in COVID-19. Although activated immune cells orchestrate a  
85 protective function against SARS-CoV-2, they also participate in tissue damage if  
86 overactivated by inflammatory stimuli(4). Numerous studies have investigated  
87 humoral and cellular immune responses in patients who have recovered from  
88 COVID-19(5-7). For example, peripheral blood SARS-CoV-2-specific T cells are  
89 detectable in convalescent patients, especially SARS-CoV-2-specific CD8+ and

90 CD4+ T cells, which correlated not only with serum neutralizing activities but also  
91 with disease severity(7-11). One study detected both virus-specific memory B and T  
92 cells in individuals who have recovered from mildly symptomatic COVID-19, showing  
93 that these cells not only persist, but in some cases increased numerically over three  
94 months after symptom onset(5). However, it remains unclear how cellular immunity  
95 mediates long-term protective and pathogenic inflammation in COVID-19.

96 Similar to influenza virus infection(12), SARS-CoV-2-mediated lung damage  
97 entails the interplay among aberrantly activated monocytes/macrophages producing  
98 IL-1 $\beta$ , inflammation-induced impairment of alveolar epithelial regeneration, and  
99 expansion of CTHRC1+ pathological fibroblasts that promoted fibrosis and may  
100 impair regeneration(13). Zhao et al. identified clonally expanded tissue-resident  
101 Th17 cells in the lungs of patients even after SARS-CoV-2 clearance, which may  
102 interact with profibrotic macrophages and cytotoxic CD8+ T cells leading to the  
103 formation of pulmonary fibrosis(4). Although lung lesions in COVID-19 patients could  
104 be completely absorbed during follow-up with no sequelae, residual ground-glass  
105 opacification, interstitial thickening or fibrotic-like changes were observed in most  
106 patients who survived severe COVID-19(2, 14, 15). Immunologic determinants  
107 underlying pulmonary sequelae (PS) are not fully understood in COVID-19. To  
108 determine the immunopathogenesis of PS, we recruited 24 COVID-19 survivors with  
109 PS and 26 patients without PS and performed comprehensive assessments of  
110 immunological profiling. Our study highlights the profound imbalance of immune  
111 landscape in COVID-19 patients with PS, as characterized by robust activation of  
112 cytotoxic T cells, NK cells and  $\gamma\delta$  T cells as well as deficiencies in  
113 immunosuppressive cells.

114

## 115 **RESULTS**

### 116 **Clinical characteristics of convalescent patients with COVID-19**

117 A total of 50 convalescent patients with COVID-19 were included and categorized as  
118 24 patients with PS (PPSs) and 26 patients without PS (NPSs) based on radiological  
119 characteristics. As shown in Table 1, the mean age of all patients was 53.96 years,

120 with a significantly older age for PPSs than NPSs (59.63 vs 48.73,  $p < 0.0003$ ). The  
121 most common comorbidities among the patients were 20.00% with hypertension,  
122 14.00% with diabetes mellitus and 10.00% with cardiopathy. Nasopharyngeal swab  
123 SARS-CoV-2 RNA detection was negative in all patients one year after discharge  
124 (Table 1). SARS-CoV-2 IgM (2 [8.33%] patients) and IgG levels (22 [91.67%]  
125 patients) in PPSs were positive, while SARS-CoV-2 IgM (2 [7.69%] patients) and IgG  
126 levels (23 [88.46%] patients) in NPSs were positive (Table 1). The predominant  
127 patterns of PS were ground glass opacity (24 [100.00%]), fiber streak shadow (21  
128 [87.50%]) and tractive bronchiectasis (8 [33.33%]) in PPSs (Table 1). Representative  
129 chest CT scans longitudinally exhibited the change of lung lesions (Fig. 1A).  
130 Although the lung lesions gradually resolved in all patients, ground glass opacity  
131 (GGO), fiber streak shadow, tractive bronchiectasis, reticulation and  
132 bronchovascular bundle distortion could be observed in the representative patients  
133 (Fig. 1A-C). Importantly, there was a statistically significant increment in hemoglobin  
134 in PPSs in comparison to NPSs (Table 1), suggesting that residual pulmonary  
135 lesions may influence diffusion capacity and induce a compensatory increase in  
136 hemoglobin in those with PS.

137

### 138 **NK cells and short-lived effector-like CD8<sup>+</sup> T cells accumulate in PPSs**

139 Immunologic disturbance induced by SARS-CoV-2 infection is characterized by  
140 lymphopenia in those with acute COVID-19(16). Strikingly, white blood cell and  
141 lymphocyte counts were higher in PPSs than NPSs one year after discharge,  
142 whereas no significant differences in neutrophil, monocyte and platelet counts were  
143 found between the two groups (Table 1). We next analyzed the presence of  
144 lymphocyte subsets to obtain an overview of the general distribution in the peripheral  
145 blood. The NK cell percentage was significantly higher in PPSs than in NPSs, but  
146 there were no significant differences in CD3<sup>+</sup> T, CD4<sup>+</sup> T, CD8<sup>+</sup> T, NKT and  $\gamma\delta$  T cell  
147 percentages (Fig. 2A). A decreased proportion of B cells was detected in PSSs,  
148 though the memory B cell frequency was not significantly different (Fig. 2A-B).

149 We next performed immunophenotypic analyses of circulating CD4<sup>+</sup> and CD8<sup>+</sup>

150 T cells to identify their state of differentiation, exhaustion, and senescence. CD27  
151 and CD62L were used to distinguish maturation and memory subsets in CD4+ and  
152 CD8+ T cells. We found no significant differences in CD4+ T cells populations based  
153 on CD27 and CD62L expression between PPSs and NPSs (Fig. 2C). CD27-CD62L-  
154 T cells represent short-lived effector-like T cells characterized by the enrichment for  
155 antigen-experienced and senescent T cells, while CD27+CD62L+ T cells consist of  
156 naïve T cells and central memory T cells(17). Importantly, there was a statistically  
157 significant increase in the CD8+CD27-CD62L- T cells percentage in PPSs, yet the  
158 CD8+CD27+CD62L+ T cell frequency was significantly reduced (Fig. 2C). CD4+  
159 CD57+ T cells percentage tended to be higher in PPSs than in NPSs though there  
160 was no statistic difference (Fig. 2D). Higher percentage of CD8+CD57+ T cells was  
161 observed in PPSs (Fig. 2D). Moreover, increases of both CD4+ T and CD8+ T cells  
162 expressing KLRG-1 and TIM-3 were detected in PPSs, with no changes in the  
163 frequencies of CD28- and PD-1-expressing T cells between PPSs and NPSs (Fig.  
164 2D).

165

### 166 **Circulating NK cells and innate-like lymphocytes exhibit distinct phenotypes** 167 **between PPSs and NPSs**

168 NK, NKT and  $\gamma\delta$  T cells, large granular lymphocytes with the ability to lyse virally  
169 infected cells, are important components of antiviral immunity(18-20). Having  
170 established that PPSs displayed an increase in the NK cells percentage, we further  
171 analyzed the NK cell phenotype. Importantly, there was a statistically significant  
172 increment in NK cells expressing CD57, whereas the frequencies of NKP30- and  
173 NKP46-expressing NK cells were significantly reduced in PPSs (Fig. 3A). No  
174 changes in the frequencies of CD27-, KLRG1-, PD-1-, TIM-3-, NKB1-, NKG2A- and  
175 NKG2D-expressing NK cells were noted between the two groups (Fig. 3A). Focusing  
176 on NKT cells, we observed an increase in the fraction of those expressing TIM-3 and  
177 NKP30, but the fraction of NKB1+NKT cells was markedly decreased in PPSs (Fig.  
178 3B), suggesting that NKT cells exhibit an activated or exhausted state. However,  
179 there were no significant differences in the frequencies of CD27-, CD57-, KLRG1-,

180 PD-1-, NKG2A-, NKG2D- and NKP46-expressing NKT cells between the two groups  
181 (Fig. 3B). Moreover,  $\gamma\delta$  T cells from PPSs overexpressed CD57, KLRG1, TIM-3 and  
182 NKP30 (Fig. 3C), which is compatible with a senescent, hyperactivated and  
183 exhaustion profile. Downregulation of the inhibitory receptor NKB1 and CD27 in  $\gamma\delta$  T  
184 cells was found in PPSs, but PD-1, NKG2A and NKP46 expressions were unaffected  
185 (Fig. 3C).

186

### 187 **Coexistence of senescence and exhaustion phenotypic signatures in** 188 **cytokine-secreting cells in PPSs**

189 We next assessed cytokine production in CD3<sup>+</sup> T cells after stimulation with PMA  
190 and ionomycin and observed that in comparison to NPSs, CD4<sup>+</sup> T cells from PPSs  
191 overexpressed IL-17A and IFN- $\gamma$  but not IL-2, IL-4 or TNF $\alpha$  (Fig. 4A). The frequency  
192 of IFN- $\gamma$  expression was higher among CD8<sup>+</sup> T cells in PPSs compared with NPSs,  
193 with no significant differences in IL-4, IL-17A and TNF- $\alpha$  production in CD8<sup>+</sup> T cells  
194 between the two groups (Fig. 4B). Nonetheless, CD8<sup>+</sup> T cells from PPSs showed  
195 downregulated IL-2 expression compared with NPSs (Fig. 4B). We next investigated  
196 the degranulation capacity and cytotoxic molecule expression in CD4<sup>+</sup> T, CD8<sup>+</sup> T,  
197 NK, NKT and  $\gamma\delta$  T cells. Based on functional characterization, CD4<sup>+</sup> T, CD8<sup>+</sup> T, NK  
198 and  $\gamma\delta$  T cells exhibited upregulation of GZMB and perforin in PPSs compared with  
199 NPSs (Fig. 4C-D). However, no significant differences in GZMB and perforin  
200 expression in NKT cells were observed (Fig. 4C-D).

201 We next used a clustering and visualization strategy to investigate the  
202 co-expression of CD27, CD28, PD-1, and CD57 together with cytokines (IL-2, IL-4,  
203 IL-17A, TNF- $\alpha$  and IFN- $\gamma$ ) and cytotoxic molecules (GZMB and perforin) (Fig. 5A-B  
204 and Supplementary Figure 1H-I). The advantage of this analysis lies in its integration  
205 of surface and functional markers at a single-cell level, providing an improved  
206 understanding of their high-dimensional relationship. CD4<sup>+</sup>IL-2<sup>+</sup> T, CD4<sup>+</sup>IL-4<sup>+</sup> T and  
207 CD4<sup>+</sup>IL-17A<sup>+</sup> T cells hardly expressed CD57 (Fig. 5A). Phenotypic characterization  
208 further demonstrated that CD4<sup>+</sup> T cells expressing IL-2, IL-4 and IL-17A were  
209 prominent among the CD28<sup>+</sup> T cells (Fig. 5A). According to representative scatter

210 plot, IFN- $\gamma$  could be secreted by CD4+CD57+ T cells and CD4+CD57- T cells;  
211 furthermore, CD4+CD57+IFN- $\gamma$ + T cells were enriched among CD4+CD28- T cells  
212 (Fig. 5A). As observed in CD4+ T cells, the co-expression of IL-2, IL-4, and IL-17A  
213 together with CD28 and CD57 could be similarly observed in CD8+ T cells  
214 (Supplementary Fig. 1H). Next, we investigated whether PD-1 expression correlates  
215 with cytokine production in the T cell population. We found that IL-2, IL-4, IL-17A,  
216 TNF- $\alpha$  and IFN- $\gamma$  expressions were mainly distributed in PD-1- T cells (Fig. 5A and  
217 Supplementary Fig. 1H). We summarized these data in a heatmap and exhibited the  
218 distributions of IL-2, IL-4, IL-17A, TNF- $\alpha$  and IFN- $\gamma$  expression together with CD28,  
219 CD57 and PD-1 between the two groups (Fig. 5C).

220 We next investigated the expression of CD27, CD28, and CD57 together with  
221 cytotoxic molecules in CD4+ T, CD8+ T, NK, NKT and  $\gamma\delta$  T cells (Fig. 5B). According  
222 to representative scatter plot, GZMB and perforin expression were higher among  
223 CD4+CD57+ T cells than CD4+CD57- T cells in both groups; furthermore,  
224 CD4+CD57+GZMB+ T cells and CD4+CD57+perforin+ T cells were mainly enriched  
225 among CD27- cells and CD28- cells (Fig. 5B and Supplementary Fig. 1I). As  
226 observed in CD4+ T cells, GZMB and perforin expression in CD8+ T, NK, NKT and  
227  $\gamma\delta$  T cells were similarly enriched among CD57+ cells, CD28- cells and CD27- cells  
228 (Fig. 5B and Supplementary Fig. 1I). We summarized the data in a heatmap and  
229 exhibited the distributions of GZMB and perforin expressions together with CD27,  
230 CD28, and CD57 between the two groups (Fig. 5D).

231

### 232 **Comparable immunosuppressive cells between PPSs and NPSs**

233 Immunosuppressive cells served as the main mechanisms for maintaining immune  
234 homeostasis. However, there is considerable controversy regarding whether  
235 immunosuppressive cells promote or constrain the formation of fibrosis induced by  
236 pathogenic T cells(21-24). We next explored the distribution of immunosuppressive  
237 cells in recovered patients. After lysis of the erythrocytes, we directly used cell  
238 surface markers to stain monocytic myeloid-derived suppressor cells (M-MDSCs,  
239 HLA-DR-/lowCD33+CD11b+CD14+), granulocytic MDSCs (G-MDSCs, HLA-DR-/low



240 CD33+CD11b+CD14-CD15+), regulatory T cells (Tregs, CD4+CD127-/lowCD25+)  
241 and regulatory B cells (Bregs, CD19+CD24+CD38+)(25, 26). Certainly, it is not  
242 stringent to define G-MDSCs by using this method. Patients with acute COVID-19  
243 produce emergency myelopoiesis-generating immunosuppressive myeloid cells(27).  
244 But, M-MDSCs and G-MDSCs frequencies did not differ between PPSs and NPSs  
245 (Fig. 6A-B). A decrease in HLA-DR on monocytes in acute COVID-19 is associated  
246 with severe respiratory failure(28). We did not observe any significant difference in  
247 HLA-DR expression on monocyte between the two groups one year after discharge  
248 (Data not shown). Additionally, Tregs and Bregs showed no significant differences  
249 among the groups (Fig. 6C-D). Together, our data indicate that immunosuppressive  
250 cells may be insufficient to constrain the robust activation of a variety of immune  
251 cells in PPSs.

252

### 253 **The interrelation of immune cells and its association with clinical features in** 254 **COVID-19**

255 Having established that senescent signatures coexist within cytotoxic molecule-  
256 secreting cells, we further investigated the interrelation of immune cells in  
257 convalescent patients with COVID-19 (Fig. 7A). Correlation analysis verified that T  
258 cells secreting cytotoxic molecules correlated negatively with CD27+CD62L+ T cells  
259 and CD28+ T cells but positively with short-lived effector-like CD27-CD62L- T cells,  
260 CD57+ T cells and KLRG1+ T cells (Fig. 7A). CD57 and KLRG-1 are thought to be  
261 associated with T cell senescence and also serves as a marker of cytotoxic  
262 function(29). Importantly, IL-2 expression within CD8+ T cells correlated negatively  
263 with CD8+CD27-CD62L- T cells, CD8+CD57+ T cells, CD8+perforin+ T cells and  
264 CD8+GZBM+ T cells (Fig. 7A). The downregulated IL-2 expression in CD8+ T cells  
265 from PPSs further verifies that these patients retained large amounts of short-lived  
266 like CD8+ T cells that abundantly secrete cytotoxic molecules. Moreover, the  
267 expression of perforin and GZMB within NK cells were also positively associated  
268 with effector molecule CD57 but inversely with PD-1, NKP30 and NKP46 expression  
269 (Fig. 7A). Additionally, GZMB and perforin expression exhibited intrinsic positive

270 correlations among CD4<sup>+</sup> T, CD8<sup>+</sup> T, NK, NKT and  $\gamma\delta$  T cells, suggesting that  
271 SARS-CoV-2 infection may simultaneously trigger robust activation of a variety of  
272 immune cells. More detailed information is displayed in the correlation heatmap  
273 depicted in (Fig. 7A).

274 We next sought to determine whether the phenotypic and functional features of  
275 immune cells correlate with age and disease type in COVID-19. Correlation analysis  
276 suggested that age significantly influenced the phenotypic and functional features of  
277 immune cells (Fig. 7B). Senescent and short-lived like CD8<sup>+</sup> T cells, CD8<sup>+</sup> T cells  
278 secreting perforin/granzyme-B/IFN- $\gamma$ , NK cells secreting perforin/granzyme-B,  
279 NKP30+NKT, TIM-3+NKT, NKP30+ $\gamma\delta$  T, KLRG1+ $\gamma\delta$  T and CD57+ $\gamma\delta$  T cells  
280 percentages correlated positively with age, whereas B cells, CD3<sup>+</sup> T cells, NKT cells,  
281 CD8+CD27+CD62L<sup>+</sup> T cells, NKB1+ $\gamma\delta$  T cells, NKG2D+ $\gamma\delta$  T cells, CD27+NK cells,  
282 NKG2D+NK cells and NKG2D+NKT cells frequencies correlated negatively with age  
283 (Fig. 7B). Furthermore, correlation analysis of immunological parameters in PPSs  
284 and NPSs revealed that senescent, exhausted, GZMB and perforin secreting  
285 immune cells correlated positively with PS (Fig. 7B). Additionally, CD8+CD27-  
286 CD62L<sup>-</sup> T cells, NK cells, M-MDSCs, NKP30+ $\gamma\delta$  T cells, NKP30+NKT cells, CD4+  
287 IFN- $\gamma$ <sup>+</sup> and CD8+IFN- $\gamma$ <sup>+</sup> T cells percentages correlated positively with PS (Fig. 7B).

288 Next, we examined the possibility of using the above-mentioned parameters as  
289 prognostic factors for identifying determinants for residual lesions in COVID-19  
290 patients. Multivariate logistic regression analyses identified CD8+CD27+CD62L<sup>+</sup> T  
291 cells (odds ratio [OR]: 0.738; 95% CI: 0.590-0.924; p = 0.008), CD57+NK cells (OR:  
292 1.181; 95% CI: 1.038-1.343; p = 0.012), and CD4+perforin<sup>+</sup> T cells (OR:1.153; 95%  
293 CI: 0.953-1.396; p = 0.143) as independent predictors for residual lung lesions  
294 (Table 2). Additionally, receiver operating characteristic curve were carried out to  
295 assess the capacity of the three cell populations to differentiate disease type (PPSs  
296 and NPSs). The cutoff values (sensitivity and specificity) are as follows: CD8+CD27+  
297 CD62L<sup>+</sup> T cells: 26.045% (0.885% and 0.708%), CD57+NK cells: 74.095% (0.708%  
298 and 0.885%), CD4+perforin<sup>+</sup> T cells: 3.245% (0.875% and 0.423%). The AUC value  
299 of the combination of the three cells (CD57+NK cells, CD4+perforin<sup>+</sup> T cells and

300 CD8+CD27+CD62L+ T cells) was highest (0.942) (Fig. 7C-F).

301

## 302 **DISCUSSION**

303 Although a tremendous global effort by the scientific community has greatly  
304 improved our understanding of COVID-19, the immunopathogenesis of PS remains  
305 to be elucidated. Here, we describe the circulating immune landscape of COVID-19  
306 patients with PS compared with those without PS. Residual lesions in PPSs were  
307 mainly GGO and fiber streak shadow. Our study demonstrates that there existed  
308 significantly divergent in immunological characteristics between PPSs and NPSs  
309 one year after discharge. Immunological signatures in PPSs were predominated by  
310 the accumulation of CD4+ T cells secreting IL-17A and short-lived effector-like CD8+  
311 T cells with excessive secretion of IFN- $\gamma$ /granzyme-B/perforin. NK cells were  
312 characterized by excessive secretion of granzyme-B and perforin and  
313 downregulation of NKP30 and NKP46; NKT and  $\gamma\delta$  T cells demonstrated highly  
314 activated and exhausted states in PPSs. Overall, we observed robust activation of a  
315 variety of immune cells in response to SARS-CoV-2 infection and specific features  
316 unique to COVID-19 with PS and hyperinflammation, providing a base for  
317 understanding the role of cellular immunity in patients with COVID-19.

318 Over 80% of patients with COVID-19 experience lymphopenia and exhibit  
319 drastically reduced numbers of various lymphocyte subsets, including CD4+ T, CD8+  
320 T, B,  $\gamma\delta$  T and NK cells, especially in the peripheral blood of those with severe  
321 COVID-19 during the acute phase(16, 30-34). Early-stage lymphopenia is thought to  
322 correlate with lymphocyte chemotaxis in COVID-19(35, 36). To our surprise,  
323 lymphocyte counts were higher in PPSs than in NPSs one year after discharge,  
324 suggesting that lymphocytes may exit inflamed tissues and undergo clonal  
325 expansion after the resolution of SARS-CoV-2 infection. In general, clonal expansion  
326 of both innate and adaptive lymphocytes is a critical process for host defense via  
327 amplification of lymphocytes specific to the invading pathogen. The NK cell  
328 percentage was significantly higher in PPSs than in NPSs, whereas the B cell  
329 frequency was lower in the former, suggesting that NK cells underwent more

330 significant clonal expansion. A previous study found that decreased B cells were  
331 associated with prolonged viral RNA shedding from the respiratory tract in  
332 COVID-19(37). Nevertheless, the reason for the obvious expansion of NK cells  
333 following SARS-CoV-2 clearance in PPSs remained to be elucidated. Prolonged viral  
334 RNA shedding may induce clonal expansion of NK cells in an antigen-specific  
335 manner, similar to the response to cytomegalovirus infection to acquiring memory  
336 features(38). Since reverse-transcribed SARS-CoV-2 RNA can integrate into the  
337 genome of cultured human cells and can be expressed in patient-derived tissues(39),  
338 there might also be latent SARSCoV-2 virus in the reservoir cells in PPSs that could  
339 lead to the prolonged expansion of NK cells.

340 Excessive activation of proinflammatory immune cells can lead to enhanced  
341 inflammation and injury during pulmonary viral infection(40). COVID-19 promotes  
342 cell polarization of naive and memory cells to effector, cytotoxic, exhausted and  
343 regulatory cells, along with increased late NK cells, and induces gene expression  
344 related to inflammation and cellular senescence(41). By examining the phenotypic  
345 characteristics of T cells, we observed a low percentage of CD8+CD27+CD62L+ T  
346 cells but high level of CD8+CD27-CD62L- T cells in PSSs. T cells in PSSs displayed  
347 an overall exhausted and senescent phenotype, with overexpression of CD57,  
348 KLRG-1 and TIM-3. Functional analysis further revealed that upregulation of  
349 degranulation capacity and cytotoxic molecules in CD4+ and CD8+ T cells in PPSs  
350 compared with NPSs. Our findings are in line with published papers(42-44).  
351 SARS-CoV-2 infection may induce a cytotoxic response, characterized by  
352 simultaneous production of GZMB and perforin in T cells, NK cells and  $\gamma\delta$  T cells in  
353 PPSs. Excessive activation of cytotoxic T, NK and  $\gamma\delta$  T cells is not protective but  
354 rather drives pulmonary damage after SARS-CoV-2 infection.

355 Emerging evidence suggests that COVID-19 survivors have impaired lung  
356 function, with the development of pulmonary fibrosis(2, 14). Tissue-resident CD8 + T  
357 cells drive age-associated chronic lung sequelae after viral pneumonia(45). Besides,  
358 clonally expanded tissue-resident memory-like Th17 cells may interact with  
359 pro-fibrotic macrophages and cytotoxic CD8+ T cells leading to the formation of

360 pulmonary fibrosis(4). We observed that peripheral blood CD4<sup>+</sup> T cells  
361 overexpressed IL-17A/IFN- $\gamma$  and that CD8<sup>+</sup> T cells overexpressed IFN- $\gamma$ /GZMB/  
362 perforin in PSSs. CD103<sup>high</sup> Tregs can constrain lung fibrosis induced by CD103<sup>low</sup>  
363 tissue-resident pathogenic CD4<sup>+</sup> T cells with higher production of effector cytokines,  
364 such as IL-4, IL-5, IL-13, IL-17A and IFN- $\gamma$ (23). However, immunosuppressive cells  
365 were comparable between PPSs and NPSs in our study, indicating that these cells  
366 may be insufficient to constrain the robust activation of a variety of immune cells in  
367 PSSs. Considering that Tregs are equally important to prevent inflammation-induced  
368 tissue damage during acute infections and to promote tissue repair, the scholars  
369 suggest that Tregs-based strategies could be considered for COVID-19 patient  
370 management(46). Hence, immune intervention may be one of the effective treatment  
371 measures to reduce the occurrence of PS after the resolution of SARS-CoV-2  
372 infection.

373 Several other important findings emerged from our data. First, IL-2<sup>+</sup> T cells,  
374 IL-4<sup>+</sup> T cells and IL-17A<sup>+</sup> T cells hardly expressed CD57 but were enriched among  
375 CD28<sup>+</sup> cells, indicating that autocrine cytokines may provide a tonic signal that  
376 inhibits senescence. Furthermore, CD4<sup>+</sup> T cells, CD8<sup>+</sup> T cells, NK cells, NKT cells  
377 and  $\gamma\delta$  T cells secreting GZMB and perforin were enriched among CD57<sup>+</sup> cells,  
378 CD28<sup>-</sup> cells and CD27<sup>-</sup> cells. Although peripheral blood CD57<sup>+</sup> T cells exhibit  
379 phenotypic and functional features of terminally differentiated effector cells, these  
380 cells display enhanced cytotoxic function(47-49). Moreover, GZMB and perforin  
381 expression exhibited intrinsic positive correlations among CD4<sup>+</sup> T cells, CD8<sup>+</sup> T cells,  
382 NK cells, NKT cells and  $\gamma\delta$  T cells, suggesting that SARS-CoV-2 infection may  
383 simultaneously activate a variety of immune cells. In addition, we also noted  
384 downregulated expression of NKP30 and NKP46 in NK cells, despite excessive  
385 secretion of perforin and GZMB in PPSs. Combined with previous research showing  
386 reduced surface expression of NKP30 and NKP46 on adaptive memory NK cells(50),  
387 downregulated expression of NKP30 and NKP46 may act as a protective  
388 mechanism against tissue damage induced by excessive secretion of perforin and  
389 GZMB. Certainly, SARS-CoV-2 may escape the killing of NK cells and damage lung

390 tissue due to downregulated expression of NKP30 and NKP46.

391 Although our study confirms some findings and provides new data on the innate  
392 and adaptive immune landscape of patients with PS who have recovered from  
393 COVID-19 one year after discharge, we recognize limitations that might be  
394 overcome with larger sample sizes and matched control populations. Furthermore,  
395 there is a lack of understanding of the phenotype and function of immune cells from  
396 the lungs, which may directly participate in the formation of PS. Hence, the hierarchy  
397 of immunodominant circulating blood immune cells may not exactly reflect  
398 immunophenotypic features in the lungs. In summary, our study first shows  
399 significant differences in immunological characteristics between PPSs and NPSs  
400 one year after discharge. Although the detailed mechanisms by which cellular  
401 immunity participates in the development of PS remain to be investigated, our  
402 in-depth analysis of immunological profiling contributes to our understanding of the  
403 immunopathogenesis of COVID-19, facilitating the tailoring of more effective and  
404 proactive therapies for these patients.

405

## 406 **MATERIALS AND METHODS**

### 407 **Study design and participants**

408 In order to determine the immunopathogenesis of residual lung lesions in COVID-19  
409 survivors one year after discharge, a total of 50 convalescent patients were recruited  
410 at union hospitals. At the visit, routine blood test, chest computed tomography (CT)  
411 scans, and nucleic acid test and antibody detection for SARS-CoV-2 were performed  
412 for each participant. The patients were classified as 24 PPSs and 26 NPSs  
413 according to radiological characteristics. Patients who reached complete radiological  
414 resolution were regarded as NPSs. Complete radiological resolution was defined as  
415 the absence of any chest radiographic abnormality potentially related to infection(51).  
416 PS including residual GGO, fibrous stripe shadow, tractive bronchiectasis,  
417 reticulation and bronchovascular bundle distortion were evaluated by two  
418 radiologists. During our recruitment process, we excluded participants with the  
419 underlying chronic lung diseases and cancers. This study was conducted in

420 accordance with the Declaration of Helsinki and was approved by the Ethics  
421 Committee of Union Hospital, Tongji Medical College, Huazhong University of  
422 Science and Technology (#2020/0004), and written informed consents were  
423 obtained from all participants.

424

#### 425 **Detection of SARS-CoV-2 mRNA and serum SARS-CoV-2 IgG and IgM**

426 SARS-CoV-2 RNA was detected by reverse transcription-polymerase chain reaction  
427 (RT-PCR). Total nucleic acid extraction from nasopharyngeal specimens was  
428 performed using the QIAamp RNA Viral Kit (Qiagen), and two sets of primers were  
429 taken for two target genes (ie, open reading frame 1ab [ORF1ab] and nucleocapsid  
430 protein [N]). Detection of serum SARS-CoV-2 IgG and IgM antibodies was evaluated  
431 by IgM/IgG antibody detection kit (Abbott Laboratories, Inc).

432

#### 433 **Multiparametric flow cytometric analysis**

434 Peripheral blood (200 $\mu$ L) from convalescent patients with COVID-19 was added into  
435 a tube and 2 mL of red-cell lysis buffer was added and incubated for 10 minutes.  
436 After lysis, the sample was washed twice with PBS containing 1% FBS. Immune  
437 cells were surface-stained with fluorochrome-conjugated antibodies. The samples  
438 were incubated with antibodies for 15 minutes at 4 °C. Cells were resuspended in  
439 PBS and washed at 400 g for 6 minutes. The specimens were immediately valuated  
440 by flow cytometry.

441 For cytotoxic molecule detection, we isolated peripheral blood mononuclear  
442 cells (PBMCs) from heparinized blood by Ficoll-Hypaque gradient centrifugation  
443 (Pharmacia, Uppsala, Sweden). For surface staining, PBMCs were washed twice  
444 with PBS containing 1% FBS and stained with fluorochrome-conjugated antibodies.  
445 Intracellular staining for granzyme B (GZMB) and perforin was performed after cell  
446 fixation and permeabilization (eBioscience), and then intracellular proteins were  
447 labeled with the corresponding antibodies conjugated with fluorescent molecules  
448 according to the manufacturer's instructions.

449 A list of the antibodies used is provided in Supplementary Table 1, and the

450 gating strategy is presented in Supplementary Fig. 1. Flow cytometry was performed  
451 using a BD LSRFortessa X-20 (BD Biosciences), and data were analyzed with  
452 FlowJo V10 software.

453

#### 454 **Cytokine production assays**

455 PBMCs were cultured in RPMI1640 supplemented with 10% FBS, and cytokine  
456 production assays were performed after lymphocytes were stimulated with  
457 polymethyl acrylate (PMA, 50 ng/mL) and ionomycin (1  $\mu$ M) in the presence of  
458 Golgi-Stop. After 5 hours at 37  $^{\circ}$ C , the cells were stained with fluorochrome  
459 associated antibodies specific for surface molecules; next, the cells underwent  
460 fixation and permeabilization for intracellular staining with antibodies specific for the  
461 following intracellular proteins: IL-2, IL-4, IL-17A, IFN- $\gamma$  and TNF- $\alpha$ .

462

#### 463 **Statistical analysis**

464 The Shapiro-Wilk test was used to evaluate the distribution of variance. Continuous  
465 variables with normally and nonnormally distributed data were assessed using  
466 unpaired two-tailed Student's t tests or Mann-Whitney U test, respectively. The  
467 Fisher's exact test was applied to examine categorical variables. Spearman's rank  
468 coefficient was used to determine correlations between two variables. Multivariate  
469 logistic regression analyses were performed to identify the independent predictive  
470 factors of residual lesions. The final model was determined using stepwise logistic  
471 regression, with significance level for selection set at  $p = 0.05$ . The optimum cut-off  
472 values were defined based on their maximum Youden index (sensitivity+  
473 specificity-1). All tests were 2-sided, and significance levels were set to  $p < 0.05$  (\*),  
474  $p < 0.01$  (\*\*),  $p < 0.001$  (\*\*\*),  $p < 0.0001$  (\*\*\*\*) and ns means not significant. All  
475 statistical data were analyzed using SPSS version 25.0 Statistical Software (Chicago,  
476 IL, USA), GraphPad Prism 8 software (GraphPad Software, La Jolla, California) or R  
477 software Version 4.0.2 (Institute for Statistics and Mathematics, Vienna, Austria).

478

#### 479 **ACKNOWLEDGMENTS**



480 We would like to thank all participating patients for their support and cooperation as  
481 well as our colleagues from Imaging Department of Union hospital. This work was  
482 supported by funds from the Key Special Project of Ministry of Science and  
483 Technology, China (No.2020YFC0845700), Scientific Research Projects of Chinese  
484 Academy of Engineering (NO.2020-KYGG-01-07) and Fundamental Research  
485 Funds for the Central Universities (NO.2020kfyXGYJ029).

486

## 487 REFERENCES

- 488 1. Wu Z, McGoogan JM. 2020. Characteristics of and Important Lessons From  
489 the Coronavirus Disease 2019 (COVID-19) Outbreak in China: Summary of a  
490 Report of 72314 Cases From the Chinese Center for Disease Control and  
491 Prevention. *JAMA* 323:1239-1242. <https://doi:10.1001/jama.2020.2648>
- 492 2. Xu J, Zhou M, Luo P, Yin Z, Wang S, Liao T, Yang F, Wang Z, Yang D, Peng Y,  
493 Geng W, Li Y, Zhang H, Yang J. 2021. Plasma metabolomic profiling of  
494 patients recovered from COVID-19 with pulmonary sequelae 3 months after  
495 discharge. *Clin Infect Dis*  
496 doi:10.1093/cid/ciab147. <https://doi:10.1093/cid/ciab147>
- 497 3. Azkur AK, Akdis M, Azkur D, Sokolowska M, van de Veen W, Bruggen MC,  
498 O'Mahony L, Gao Y, Nadeau K, Akdis CA. 2020. Immune response to  
499 SARS-CoV-2 and mechanisms of immunopathological changes in COVID-19.  
500 *Allergy* 75:1564-1581. <https://doi:10.1111/all.14364>
- 501 4. Zhao Y, Kilian C, Turner JE, Bosurgi L, Roedel K, Bartsch P, Gnirck AC, Cortesi  
502 F, Schultheiss C, Hellmig M, Enk LUB, Hausmann F, Borchers A, Wong MN,  
503 Paust HJ, Siracusa F, Scheibel N, Herrmann M, Rosati E, Bacher P, Kylies D,  
504 Jarczак D, Lutgehetmann M, Pfefferle S, Steurer S, Zur-Wiesch JS, Puelles  
505 VG, Sperhake JP, Addo MM, Lohse AW, Binder M, Huber S, Huber TB, Kluge  
506 S, Bonn S, Panzer U, Gagliani N, Krebs CF. 2021. Clonal expansion and  
507 activation of tissue-resident memory-like Th17 cells expressing GM-CSF in  
508 the lungs of severe COVID-19 patients. *Sci Immunol*  
509 6. <https://doi:10.1126/sciimmunol.abf6692>
- 510 5. Rodda LB, Netland J, Shehata L, Pruner KB, Morawski PA, Thouvenel CD,  
511 Takehara KK, Eggenberger J, Hemann EA, Waterman HR, Fahning ML, Chen  
512 Y, Hale M, Rathe J, Stokes C, Wrenn S, Fiala B, Carter L, Hamerman JA,  
513 King NP, Gale M, Jr., Campbell DJ, Rawlings DJ, Pepper M. 2021. Functional  
514 SARS-CoV-2-Specific Immune Memory Persists after Mild COVID-19. *Cell*  
515 184:169-183. <https://doi:10.1016/j.cell.2020.11.029>
- 516 6. Jiang XL, Wang GL, Zhao XN, Yan FH, Yao L, Kou ZQ, Ji SX, Zhang XL, Li  
517 CB, Duan LJ, Li Y, Zhang YW, Duan Q, Wang TC, Li ET, Wei X, Wang QY,  
518 Wang XF, Sun WY, Gao YW, Kang DM, Zhang JY, Ma MJ. 2021. Lasting  
519 antibody and T cell responses to SARS-CoV-2 in COVID-19 patients three

- 520 months after infection. Nat Commun  
521 12:897. <https://doi.org/10.1038/s41467-021-21155-x>
- 522 7. Sekine T, Perez-Potti A, Rivera-Ballesteros O, Stralin K, Gorin JB, Olsson A,  
523 Llewellyn-Lacey S, Kamal H, Bogdanovic G, Muschiol S, Wullimann DJ,  
524 Kammann T, Emgard J, Parrot T, Folkesson E, Karolinska C-SG, Rooyackers  
525 O, Eriksson LI, Henter JI, Sonnerborg A, Allander T, Albert J, Nielsen M,  
526 Klingstrom J, Gredmark-Russ S, Bjorkstrom NK, Sandberg JK, Price DA,  
527 Ljunggren HG, Aleman S, Buggert M. 2020. Robust T Cell Immunity in  
528 Convalescent Individuals with Asymptomatic or Mild COVID-19. *Cell*  
529 183:158-168. <https://doi.org/10.1016/j.cell.2020.08.017>
- 530 8. Grifoni A, Weiskopf D, Ramirez SI, Mateus J, Dan JM, Moderbacher CR,  
531 Rawlings SA, Sutherland A, Premkumar L, Jadi RS, Marrama D, de Silva AM,  
532 Frazier A, Carlin AF, Greenbaum JA, Peters B, Krammer F, Smith DM, Crotty  
533 S, Sette A. 2020. Targets of T Cell Responses to SARS-CoV-2 Coronavirus in  
534 Humans with COVID-19 Disease and Unexposed Individuals. *Cell*  
535 181:1489-1501. <https://doi.org/10.1016/j.cell.2020.05.015>
- 536 9. Le Bert N, Tan AT, Kunasegaran K, Tham CYL, Hafezi M, Chia A, Chng MHY,  
537 Lin M, Tan N, Linster M, Chia WN, Chen MI, Wang LF, Ooi EE, Kalimuddin S,  
538 Tambyah PA, Low JG, Tan YJ, Bertoletti A. 2020. SARS-CoV-2-specific T cell  
539 immunity in cases of COVID-19 and SARS, and uninfected controls. *Nature*  
540 584:457-462. <https://doi.org/10.1038/s41586-020-2550-z>
- 541 10. Ni L, Ye F, Cheng ML, Feng Y, Deng YQ, Zhao H, Wei P, Ge J, Gou M, Li X,  
542 Sun L, Cao T, Wang P, Zhou C, Zhang R, Liang P, Guo H, Wang X, Qin CF,  
543 Chen F, Dong C. 2020. Detection of SARS-CoV-2-Specific Humoral and  
544 Cellular Immunity in COVID-19 Convalescent Individuals. *Immunity*  
545 52:971-977. <https://doi.org/10.1016/j.immuni.2020.04.023>
- 546 11. Peng Y, Mentzer AJ, Liu G, Yao X, Yin Z, Dong D, Dejnirattisai W, Rostron T,  
547 Supasa P, Liu C, Lopez-Camacho C, Slon-Campos J, Zhao Y, Stuart DI,  
548 Paesen GC, Grimes JM, Antson AA, Bayfield OW, Hawkins D, Ker DS, Wang  
549 B, Turtle L, Subramaniam K, Thomson P, Zhang P, Dold C, Ratcliff J,  
550 Simmonds P, de Silva T, Sopp P, Wellington D, Rajapaksa U, Chen YL, Salio  
551 M, Napolitani G, Paes W, Borrow P, Kessler BM, Fry JW, Schwabe NF,  
552 Semple MG, Baillie JK, Moore SC, Openshaw PJM, Ansari MA, Dunachie S,  
553 Barnes E, Frater J, Kerr G, Goulder P, Lockett T, Levin R, Zhang Y, Jing R, Ho  
554 LP, Oxford Immunology Network Covid-19 Response TcC, Investigators IC,  
555 Cornall RJ, Conlon CP, Klenerman P, Sreaton GR, Mongkolsapaya J,  
556 McMichael A, Knight JC, Ogg G, Dong T. 2020. Broad and strong memory  
557 CD4(+) and CD8(+) T cells induced by SARS-CoV-2 in UK convalescent  
558 individuals following COVID-19. *Nat Immunol*  
559 doi:10.1038/s41590-020-0782-6. <https://doi.org/10.1038/s41590-020-0782-6>
- 560 12. Herold S, Becker C, Ridge KM, Budinger GR. 2015. Influenza virus-induced  
561 lung injury: pathogenesis and implications for treatment. *Eur Respir J*  
562 45:1463-78. <https://doi.org/10.1183/09031936.00186214>
- 563 13. Melms JC, Biermann J, Huang H, Wang Y, Nair A, Tagore S, Katsyv I,

- 564 Rendeiro AF, Amin AD, Schapiro D, Frangieh CJ, Luoma AM, Filliol A, Fang Y,  
565 Ravichandran H, Clausi MG, Alba GA, Rogava M, Chen SW, Ho P, Montoro  
566 DT, Kornberg AE, Han AS, Bakhoun MF, Anandasabapathy N,  
567 Suarez-Farinas M, Bakhoun SF, Bram Y, Borczuk A, Guo XV, Lefkowitz JH,  
568 Marboe C, Lagana SM, Del Portillo A, Zorn E, Markowitz GS, Schwabe RF,  
569 Schwartz RE, Elemento O, Saqi A, Hibshoosh H, Que J, Izar B. 2021. A  
570 molecular single-cell lung atlas of lethal COVID-19. *Nature*  
571 doi:10.1038/s41586-021-03569-1. [https://doi:10.1038/s41586-021-03569-1](https://doi.org/10.1038/s41586-021-03569-1)
- 572 14. Han X, Fan Y, Alwalid O, Li N, Jia X, Yuan M, Li Y, Cao Y, Gu J, Wu H, Shi H.  
573 2021. Six-month Follow-up Chest CT Findings after Severe COVID-19  
574 Pneumonia. *Radiology*  
575 299:E177-E186. [https://doi:10.1148/radiol.2021203153](https://doi.org/10.1148/radiol.2021203153)
- 576 15. Liu D, Zhang W, Pan F, Li L, Yang L, Zheng D, Wang J, Liang B. 2020. The  
577 pulmonary sequelae in discharged patients with COVID-19: a short-term  
578 observational study. *Respir Res*  
579 21:125. [https://doi:10.1186/s12931-020-01385-1](https://doi.org/10.1186/s12931-020-01385-1)
- 580 16. Guan WJ, Ni ZY, Hu Y, Liang WH, Ou CQ, He JX, Liu L, Shan H, Lei CL, Hui  
581 DSC, Du B, Li LJ, Zeng G, Yuen KY, Chen RC, Tang CL, Wang T, Chen PY,  
582 Xiang J, Li SY, Wang JL, Liang ZJ, Peng YX, Wei L, Liu Y, Hu YH, Peng P,  
583 Wang JM, Liu JY, Chen Z, Li G, Zheng ZJ, Qiu SQ, Luo J, Ye CJ, Zhu SY,  
584 Zhong NS, China Medical Treatment Expert Group for C. 2020. Clinical  
585 Characteristics of Coronavirus Disease 2019 in China. *N Engl J Med*  
586 382:1708-1720. [https://doi:10.1056/NEJMoa2002032](https://doi.org/10.1056/NEJMoa2002032)
- 587 17. Pandit A, De Boer RJ. 2019. Stochastic Inheritance of Division and Death  
588 Times Determines the Size and Phenotype of CD8(+) T Cell Families. *Front*  
589 *Immunol* 10:436. [https://doi:10.3389/fimmu.2019.00436](https://doi.org/10.3389/fimmu.2019.00436)
- 590 18. Hammer Q, Ruckert T, Romagnani C. 2018. Natural killer cell specificity for  
591 viral infections. *Nat Immunol*  
592 19:800-808. [https://doi:10.1038/s41590-018-0163-6](https://doi.org/10.1038/s41590-018-0163-6)
- 593 19. Godfrey DI, Stankovic S, Baxter AG. 2010. Raising the NKT cell family. *Nat*  
594 *Immunol* 11:197-206. [https://doi:10.1038/ni.1841](https://doi.org/10.1038/ni.1841)
- 595 20. Yazdanifar M, Mashkour N, Bertaina A. 2020. Making a case for using  
596 gammadelta T cells against SARS-CoV-2. *Crit Rev Microbiol*  
597 46:689-702. [https://doi:10.1080/1040841X.2020.1822279](https://doi.org/10.1080/1040841X.2020.1822279)
- 598 21. Fernandez IE, Greiffo FR, Frankenberger M, Bandres J, Heinzelmann K,  
599 Neurohr C, Hatz R, Hartl D, Behr J, Eickelberg O. 2016. Peripheral blood  
600 myeloid-derived suppressor cells reflect disease status in idiopathic  
601 pulmonary fibrosis. *Eur Respir J*  
602 48:1171-1183. [https://doi:10.1183/13993003.01826-2015](https://doi.org/10.1183/13993003.01826-2015)
- 603 22. Lebrun A, Lo Re S, Chantry M, Izquierdo Carrera X, Uwambayinema F, Ricci  
604 D, Devosse R, Ibouaaden S, Brombin L, Palmari-Pallag M, Yakoub Y,  
605 Pasparakis M, Lison D, Huaux F. 2017. CCR2(+) monocytic myeloid-derived  
606 suppressor cells (M-MDSCs) inhibit collagen degradation and promote lung  
607 fibrosis by producing transforming growth factor-beta1. *J Pathol*

- 608 243:320-330.<https://doi.org/10.1002/path.4956>
- 609 23. Ichikawa T, Hirahara K, Kokubo K, Kiuchi M, Aoki A, Morimoto Y, Kumagai J,  
610 Onodera A, Mato N, Tumes DJ, Goto Y, Hagiwara K, Inagaki Y, Sparwasser T,  
611 Tobe K, Nakayama T. 2019. CD103(hi) Treg cells constrain lung fibrosis  
612 induced by CD103(lo) tissue-resident pathogenic CD4 T cells. *Nat Immunol*  
613 20:1469-1480.<https://doi.org/10.1038/s41590-019-0494-y>
- 614 24. Zhang M, Zhang S. 2020. T Cells in Fibrosis and Fibrotic Diseases. *Front*  
615 *Immunol* 11:1142.<https://doi.org/10.3389/fimmu.2020.01142>
- 616 25. Cassetta L, Baekkevold ES, Brandau S, Bujko A, Cassatella MA, Dorhoi A,  
617 Krieg C, Lin A, Lore K, Marini O, Pollard JW, Roussel M, Scapini P, Umansky  
618 V, Adema GJ. 2019. Deciphering myeloid-derived suppressor cells: isolation  
619 and markers in humans, mice and non-human primates. *Cancer Immunol*  
620 *Immunother* 68:687-697.<https://doi.org/10.1007/s00262-019-02302-2>
- 621 26. Krejcik J, Casneuf T, Nijhof IS, Verbist B, Bald J, Plesner T, Syed K, Liu K, van  
622 de Donk NW, Weiss BM, Ahmadi T, Lokhorst HM, Mutis T, Sasser AK. 2016.  
623 Daratumumab depletes CD38+ immune regulatory cells, promotes T-cell  
624 expansion, and skews T-cell repertoire in multiple myeloma. *Blood*  
625 128:384-94.<https://doi.org/10.1182/blood-2015-12-687749>
- 626 27. Silvin A, Chapuis N, Dunsmore G, Goubet AG, Dubuisson A, Derosa L, Almire  
627 C, Henon C, Kosmider O, Droin N, Rameau P, Catelain C, Alfaro A, Dussiau C,  
628 Friedrich C, Sourdeau E, Marin N, Szwebel TA, Cantin D, Mouthon L,  
629 Borderie D, Deloger M, Bredel D, Mouraud S, Drubay D, Andrieu M, Lhonneur  
630 AS, Saada V, Stoclin A, Willekens C, Pommeret F, Griscelli F, Ng LG, Zhang Z,  
631 Bost P, Amit I, Barlesi F, Marabelle A, Pene F, Gachot B, Andre F, Zitvogel L,  
632 Ginhoux F, Fontenay M, Solary E. 2020. Elevated Calprotectin and Abnormal  
633 Myeloid Cell Subsets Discriminate Severe from Mild COVID-19. *Cell*  
634 182:1401-1418.<https://doi.org/10.1016/j.cell.2020.08.002>
- 635 28. Ong EZ, Chan YFZ, Leong WY, Lee NMY, Kalimuddin S, Haja Mohideen SM,  
636 Chan KS, Tan AT, Bertoletti A, Ooi EE, Low JGH. 2020. A Dynamic Immune  
637 Response Shapes COVID-19 Progression. *Cell Host Microbe*  
638 <https://doi.org/10.1016/j.chom.2020.03.021>
- 639 29. Diggins KE, Serti E, Muir V, Rosasco M, Lu T, Balmas E, Nepom G, Long SA,  
640 Linsley PS. 2021. Exhausted-like CD8+ T cell phenotypes linked to C-peptide  
641 preservation in alefacept-treated T1D subjects. *JCI Insight*  
642 6.<https://doi.org/10.1172/jci.insight.142680>
- 643 30. Liu J, Li S, Liu J, Liang B, Wang X, Wang H, Li W, Tong Q, Yi J, Zhao L, Xiong  
644 L, Guo C, Tian J, Luo J, Yao J, Pang R, Shen H, Peng C, Liu T, Zhang Q, Wu  
645 J, Xu L, Lu S, Wang B, Weng Z, Han C, Zhu H, Zhou R, Zhou H, Chen X, Ye P,  
646 Zhu B, Wang L, Zhou W, He S, He Y, Jie S, Wei P, Zhang J, Lu Y, Wang W,  
647 Zhang L, Li L, Zhou F, Wang J, Dittmer U, Lu M, Hu Y, Yang D, Zheng X. 2020.  
648 Longitudinal characteristics of lymphocyte responses and cytokine profiles in  
649 the peripheral blood of SARS-CoV-2 infected patients. *EBioMedicine*  
650 55:102763.<https://doi.org/10.1016/j.ebiom.2020.102763>
- 651 31. Li S, Jiang L, Li X, Lin F, Wang Y, Li B, Jiang T, An W, Liu S, Liu H, Xu P, Zhao

- 652 L, Zhang L, Mu J, Wang H, Kang J, Li Y, Huang L, Zhu C, Zhao S, Lu J, Ji J,  
653 Zhao J. 2020. Clinical and pathological investigation of severe COVID-19  
654 patients. JCI Insight. <https://doi:10.1172/jci.insight.138070>
- 655 32. Wang F, Hou H, Luo Y, Tang G, Wu S, Huang M, Liu W, Zhu Y, Lin Q, Mao L,  
656 Fang M, Zhang H, Sun Z. 2020. The laboratory tests and host immunity of  
657 COVID-19 patients with different severity of illness. JCI Insight  
658 5. <https://doi:10.1172/jci.insight.137799>
- 659 33. Odak I, Barros-Martins J, Bosnjak B, Stahl K, David S, Wiesner O, Busch M,  
660 Hoepfer MM, Pink I, Welte T, Cornberg M, Stoll M, Goudeva L, Blasczyk R,  
661 Ganser A, Prinz I, Forster R, Koenecke C, Schultze-Florey CR. 2020.  
662 Reappearance of effector T cells is associated with recovery from COVID-19.  
663 EBioMedicine 57:102885. <https://doi:10.1016/j.ebiom.2020.102885>
- 664 34. Zheng M, Gao Y, Wang G, Song G, Liu S, Sun D, Xu Y, Tian Z. 2020.  
665 Functional exhaustion of antiviral lymphocytes in COVID-19 patients. Cell Mol  
666 Immunol 17:533-535. <https://doi:10.1038/s41423-020-0402-2>
- 667 35. Oja AE, Saris A, Ghandour CA, Kragten NAM, Hogema BM, Nossent EJ,  
668 Heunks LMA, Cuvalay S, Slot E, Linty F, Swaneveld FH, Vrieling H, Vidarsson  
669 G, Rispens T, van der Schoot E, van Lier RAW, Ten Brinke A, Hombrink P.  
670 2020. Divergent SARS-CoV-2-specific T- and B-cell responses in severe but  
671 not mild COVID-19 patients. Eur J Immunol  
672 50:1998-2012. <https://doi:10.1002/eji.202048908>
- 673 36. Wiersinga WJ, Rhodes A, Cheng AC, Peacock SJ, Prescott HC. 2020.  
674 Pathophysiology, Transmission, Diagnosis, and Treatment of Coronavirus  
675 Disease 2019 (COVID-19): A Review. JAMA  
676 324:782-793. <https://doi:10.1001/jama.2020.12839>
- 677 37. Hao S, Lian J, Lu Y, Jia H, Hu J, Yu G, Wang X, Xu K, Ni Q, Li Y, Liu J, Zhao H,  
678 Zhang X, Yu L, Yu X, Xiang D, Chen Y, Zheng S, Qiu Y, Li L, Liang T, Yang Y,  
679 Sheng J. 2020. Decreased B Cells on Admission Associated With Prolonged  
680 Viral RNA Shedding From the Respiratory Tract in Coronavirus Disease 2019:  
681 A Case-Control Study. J Infect Dis  
682 222:367-371. <https://doi:10.1093/infdis/jiaa311>
- 683 38. Sun JC, Beilke JN, Lanier LL. 2009. Adaptive immune features of natural killer  
684 cells. Nature 457:557-61. <https://doi:10.1038/nature07665>
- 685 39. Zhang L, Richards A, Barrasa MI, Hughes SH, Young RA, Jaenisch R. 2021.  
686 Reverse-transcribed SARS-CoV-2 RNA can integrate into the genome of  
687 cultured human cells and can be expressed in patient-derived tissues. Proc  
688 Natl Acad Sci U S A 118. <https://doi:10.1073/pnas.2105968118>
- 689 40. Yoo JK, Kim TS, Hufford MM, Braciale TJ. 2013. Viral infection of the lung:  
690 host response and sequelae. J Allergy Clin Immunol 132:1263-76; quiz  
691 1277. <https://doi:10.1016/j.jaci.2013.06.006>
- 692 41. Zheng Y, Liu X, Le W, Xie L, Li H, Wen W, Wang S, Ma S, Huang Z, Ye J, Shi  
693 W, Ye Y, Liu Z, Song M, Zhang W, Han JJ, Belmonte JCI, Xiao C, Qu J, Wang  
694 H, Liu GH, Su W. 2020. A human circulating immune cell landscape in aging  
695 and COVID-19. Protein Cell

- 696 11:740-770.<https://doi:10.1007/s13238-020-00762-2>
- 697 42. Westmeier J, Paniskaki K, Karakose Z, Werner T, Sutter K, Dolff S, Overbeck  
698 M, Limmer A, Liu J, Zheng X, Brenner T, Berger MM, Witzke O, Trilling M, Lu  
699 M, Yang D, Babel N, Westhoff T, Dittmer U, Zelinskyy G. 2020. Impaired  
700 Cytotoxic CD8(+) T Cell Response in Elderly COVID-19 Patients. *mBio*  
701 11.<https://doi:10.1128/mBio.02243-20>
- 702 43. Meckiff BJ, Ramirez-Suastegui C, Fajardo V, Chee SJ, Kusnadi A, Simon H,  
703 Eschweiler S, Grifoni A, Pelosi E, Weiskopf D, Sette A, Ay F, Seumois G,  
704 Ottensmeier CH, Vijayanand P. 2020. Imbalance of Regulatory and Cytotoxic  
705 SARS-CoV-2-Reactive CD4(+) T Cells in COVID-19. *Cell*  
706 183:1340-1353.<https://doi:10.1016/j.cell.2020.10.001>
- 707 44. Maucourant C, Filipovic I, Ponzetta A, Aleman S, Cornillet M, Hertwig L,  
708 Strunz B, Lentini A, Reinius B, Brownlie D, Cuapio A, Ask EH, Hull RM,  
709 Haroun-Izquierdo A, Schaffer M, Klingstrom J, Folkesson E, Buggert M,  
710 Sandberg JK, Eriksson LI, Rooyackers O, Ljunggren HG, Malmberg KJ,  
711 Michaelsson J, Marquardt N, Hammer Q, Stralin K, Bjorkstrom NK, Karolinska  
712 C-SG. 2020. Natural killer cell immunotypes related to COVID-19 disease  
713 severity. *Sci Immunol* 5.<https://doi:10.1126/sciimmunol.abd6832>
- 714 45. Goplen NP, Wu Y, Son YM, Li C, Wang Z, Cheon IS, Jiang L, Zhu B, Ayasoufi  
715 K, Chini EN, Johnson AJ, Vassallo R, Limper AH, Zhang N, Sun J. 2020.  
716 Tissue-resident CD8(+) T cells drive age-associated chronic lung sequelae  
717 after viral pneumonia. *Sci Immunol* 5.<https://doi:10.1126/sciimmunol.abc4557>
- 718 46. Stephen-Victor E, Das M, Karnam A, Pitard B, Gautier JF, Bayry J. 2020.  
719 Potential of regulatory T-cell-based therapies in the management of severe  
720 COVID-19. *Eur Respir J* 56.<https://doi:10.1183/13993003.02182-2020>
- 721 47. Huang B, Liu R, Wang P, Yuan Z, Yang J, Xiong H, Zhang N, Huang Q, Fu X,  
722 Sun W, Li L. 2020. CD8(+)CD57(+) T cells exhibit distinct features in human  
723 non-small cell lung cancer. *J Immunother Cancer*  
724 8.<https://doi:10.1136/jitc-2020-000639>
- 725 48. Chiang SC, Theorell J, Entesarian M, Meeths M, Mastafa M, Al-Herz W, Frisk  
726 P, Gilmour KC, Ifversen M, Langenskiold C, Machaczka M, Naqvi A, Payne J,  
727 Perez-Martinez A, Sabel M, Unal E, Unal S, Winiarski J, Nordenskiold M,  
728 Ljunggren HG, Henter JI, Bryceson YT. 2013. Comparison of primary human  
729 cytotoxic T-cell and natural killer cell responses reveal similar molecular  
730 requirements for lytic granule exocytosis but differences in cytokine  
731 production. *Blood* 121:1345-56.<https://doi:10.1182/blood-2012-07-442558>
- 732 49. Chattopadhyay PK, Betts MR, Price DA, Gostick E, Horton H, Roederer M,  
733 De Rosa SC. 2009. The cytolytic enzymes granzyme A, granzyme B, and  
734 perforin: expression patterns, cell distribution, and their relationship to cell  
735 maturity and bright CD57 expression. *J Leukoc Biol*  
736 85:88-97.<https://doi:10.1189/jlb.0208107>
- 737 50. Barrow AD, Martin CJ, Colonna M. 2019. The Natural Cytotoxicity Receptors  
738 in Health and Disease. *Front Immunol*  
739 10:909.<https://doi:10.3389/fimmu.2019.00909>

740 51. Bruns AH, Oosterheert JJ, El Moussaoui R, Opmeer BC, Hoepelman AI, Prins  
741 JM. 2010. Pneumonia recovery: discrepancies in perspectives of the  
742 radiologist, physician and patient. *J Gen Intern Med*  
743 25:203-6. <https://doi.org/10.1007/s11606-009-1182-7>

744

## 745 **Figure legends**

746 **FIG 1 Chest computed tomography scan of four patients across three time**  
747 **periods including on admission, end-hospitalization and one year after**  
748 **discharge. (A-D)** Chest CT of three time periods showed the change of lung lesions  
749 from 3 patients with pulmonary sequelae (P1, P2 and P3) and 1 patient without  
750 pulmonary sequelae (P4). **(A)** CT image of a 61-year-old man (P1) showing ground  
751 glass opacity (GGO), fiber streak shadow and reticulation one year after discharge.  
752 **(B)** CT image of a 77-year-old man (P2) showing GGO, fiber streak shadow and  
753 bronchovascular bundle distortion one year after discharge. **(C)** CT image of a  
754 58-year-old man (P3) showing GGO, fiber streak shadow and tractive bronchiectasis  
755 one year after discharge. **(D)** CT image of a 36-year-old woman (P4) showing  
756 complete resolution of lung lesions one year after discharge.

757

758 **FIG 2 Lymphocyte composition and immunophenotypic characterization of B**  
759 **and T cells in convalescent COVID-19 patients.** Circulating lymphocytes from  
760 COVID-19 patients with pulmonary sequelae (PPSs, n = 24) and patients without  
761 pulmonary sequelae (NPSs, n = 26) were analyzed by multiparameter flow cytometry.  
762 **(A)** Relative proportions of CD3<sup>+</sup> T, CD4<sup>+</sup> T, CD8<sup>+</sup> T, NK, NKT,  $\gamma\delta$  T and B cells  
763 between the two groups. **(B)** Relative proportions of memory and naive B cells  
764 between the two groups. **(C)** Relative proportions of CD4/CD8<sup>+</sup>CD27<sup>-</sup>CD62<sup>-</sup>,  
765 CD4/CD8<sup>+</sup>CD27<sup>+</sup>CD62<sup>-</sup>, and CD4/CD8<sup>+</sup>CD27<sup>-</sup>CD62<sup>+</sup> T  
766 cells between the two groups; **(D)** Relative proportions of CD4/CD8<sup>+</sup>CD28<sup>+</sup>,  
767 CD4/CD8<sup>+</sup>CD57<sup>+</sup>, CD4/CD8<sup>+</sup>KLRG1<sup>+</sup>, CD4/CD8<sup>+</sup>PD-1<sup>+</sup> T cell and CD4/CD8<sup>+</sup>  
768 TIM-3<sup>+</sup> T cells between the two groups. Data are mean  $\pm$  SD. The Mann-Whitney U  
769 test or unpaired two-tailed Student's t tests was used to compare the two groups. \*p  
770 < 0.05, \*\*p < 0.01, \*\*\*p < 0.001, \*\*\*\*p < 0.0001.

771

772 **FIG 3 Phenotypical features of NK, NKT and  $\gamma\delta$ T cells in convalescent**  
773 **COVID-19 patients.** Circulating NK, NKT and  $\gamma\delta$ T cells from COVID-19 patients with  
774 pulmonary sequelae (PPSs, n = 24) and patients without pulmonary sequelae (NPSs,  
775 n = 26) were analyzed by multiparameter flow cytometry. **(A)** Relative proportions of  
776 CD27, CD57, KLRG1, PD-1, TIM-3, NKB1, NKG2A, NKG2D, NKP30 and NKP46  
777 expression on NK cells between the two groups; **(B)** Relative proportions of CD27,  
778 CD57, KLRG1, PD-1, TIM-3, NKB1, NKG2A, NKG2D, NKP30 and NKP46  
779 expression on NKT cells between the two groups; **(C)** Relative proportions of CD27,  
780 CD57, KLRG1, PD-1, TIM-3, NKB1, NKG2A, NKG2D, NKP30 and NKP46  
781 expression on  $\gamma\delta$  T cells between the two groups. Data are mean  $\pm$  SD. The  
782 Mann-Whitney U test or unpaired two-tailed Student's t tests was used to compare  
783 the two groups. \*p < 0.05, \*\*p < 0.01, \*\*\*p < 0.001, \*\*\*\*p < 0.0001.

784

785 **FIG 4 Functional characterization of CD4+ T, CD8+ T, NK, NKT and  $\gamma\delta$  T cells.**  
786 Circulating CD4+ T, CD8+ T, NK, NKT and  $\gamma\delta$  T cells from COVID-19 patients with  
787 pulmonary sequelae (PPSs, n = 24) and patients without pulmonary sequelae (NPSs,  
788 n = 26) were analyzed by multiparameter flow cytometry. **(A)** Relative proportions of  
789 CD4+IL-2+, CD4+IL-4+, CD4+IL-17A+, CD4+IFN- $\gamma$ + and CD4+TNF- $\alpha$ + T cells  
790 between the two groups; **(B)** Relative proportions of CD8+IL-2+, CD8+IL-4+,  
791 CD8+IL-17A+, CD8+IFN- $\gamma$ + and CD8+ TNF- $\alpha$ + T cells between the two groups. **(C)**  
792 Relative proportions of perforin in circulating CD4+ T, CD8+ T, NK, NKT and  $\gamma\delta$  T  
793 cells between the two groups; **(D)** Relative proportions of GZMB in circulating CD4+  
794 T, CD8+ T, NK, NKT and  $\gamma\delta$  T cells between the two groups. Data are mean  $\pm$  SD.  
795 The Mann-Whitney U test or unpaired two-tailed Student's t tests was used to  
796 compare the two groups. \*p < 0.05, \*\*p < 0.01, \*\*\*p < 0.001, \*\*\*\*p < 0.0001.

797

798 **FIG 5 Senescence and exhaustion phenotypes coexist in cytokine- secreting**  
799 **CD4+ T, CD8+ T, NK, NKT and  $\gamma\delta$  T cells.** The co-expressions of CD27, CD28 and  
800 PD-1 together with cytokines (IL-2, IL-4, IL-17A, TNF- $\alpha$  and IFN- $\gamma$ ) in CD4+ T and



801 CD8<sup>+</sup> T cells from COVID-19 patients with pulmonary sequelae (PPSs, n = 24) and  
802 patients without pulmonary sequelae (NPSs, n = 26) were analyzed by  
803 multiparameter flow cytometry. **(A)** A bidimensional map obtained from flow  
804 cytometric data displaying the co-expression of CD27, CD28 and PD-1 together with  
805 cytokines (IL-2, IL-4, IL-17A, TNF- $\alpha$  and IFN- $\gamma$ ) in CD4<sup>+</sup> T cell. Supplementary  
806 Figure 1H displayed the co-expression of CD27, CD28 and PD-1 together with  
807 cytokines (IL-2, IL-4, IL-17A, TNF- $\alpha$  and IFN- $\gamma$ ) in CD8<sup>+</sup> T cell. The co-expressions  
808 of CD27, CD28 and 57 together with granzyme B (GZMB) and perforin in circulating  
809 CD4<sup>+</sup> T, CD8<sup>+</sup> T, NK, NKT and  $\gamma\delta$  T cells from COVID-19 patients with pulmonary  
810 sequelae (PPSs, n = 24) and patients without pulmonary sequelae (NPSs, n = 26)  
811 were analyzed by multiparameter flow cytometry. **(B)** A bidimensional map obtained  
812 from flow cytometric data displaying the co-expression of CD28 and CD57 together  
813 with GZMB and perforin in CD4<sup>+</sup> T, CD8<sup>+</sup> T, NK, NKT and  $\gamma\delta$  T cells. Supplementary  
814 Figure 1I displayed the co-expression of CD27 and CD57 together with GZMB and  
815 perforin in CD4<sup>+</sup> T, CD8<sup>+</sup> T, NK, NKT and  $\gamma\delta$  T cells. **(C)** Heatmap represents the  
816 percentage of cells in CD27<sup>+</sup>, CD27<sup>-</sup>, CD28<sup>+</sup>, CD28<sup>-</sup>, PD-1<sup>+</sup> and PD-1<sup>-</sup> clusters that  
817 express IL-2, IL-4, IL-17A, TNF- $\alpha$  and IFN- $\gamma$  in CD4<sup>+</sup> T and CD8<sup>+</sup> T cells for PPSs  
818 and NPSs. **(D)** Heatmap represents the percentage of cells in CD27<sup>+</sup>, CD27<sup>-</sup>,  
819 CD28<sup>+</sup>, CD28<sup>-</sup>, CD57<sup>+</sup> and CD57<sup>-</sup> clusters that express GZMB and perforin in  
820 CD4<sup>+</sup> T, CD8<sup>+</sup> T, NK, NKT and  $\gamma\delta$  T cells for PSSs and NPSs.

821  
822 **FIG 6 Distribution of immunosuppressive cells between patients with PS and**  
823 **patients without PS.** Circulating G-MDSCs, M-MDSCs, Tregs, and Bregs from  
824 COVID-19 patients with pulmonary sequelae (PPSs, n = 24) and patients without  
825 pulmonary sequelae (NPSs, n = 26) were analyzed by multiparameter flow cytometry.  
826 **(A)** Relative proportions of G-MDSCs between the two groups; **(B)** Relative  
827 proportions of M-MDSCs between the two groups. **(C)** Relative proportions of Tregs  
828 frequencies between the two groups; **(D)** Relative proportions of Bregs between the  
829 two groups. Data are mean  $\pm$  SD. The Mann-Whitney U test or unpaired two-tailed  
830 Student's t tests was used to compare the two groups. \*p < 0.05, \*\*p < 0.01, \*\*\*p <

831 0.001, \*\*\*\*p < 0.0001.

832

833 **FIG 7 The interrelation of immune cells and its correlation with clinical features.**

834 **(A)** Correlation heatmap exhibited the interrelation of immune cells in all recruited  
835 patients with COVID-19. **(B)** Correlation heatmap exhibited the correlation of  
836 immunological parameters with age and disease type (two types: patients with  
837 pulmonary sequelae and patients without pulmonary sequelae). Spearman's rank  
838 coefficient was used to determine correlations between two variables. The three  
839 most contributing variables (CD8+CD27+CD62+ T cells, CD57+NK cells and  
840 CD4+perforin+ T cells) were identified by multivariate logistic regression analyses.  
841 **(C-F)** ROC curves were calculated for these selected parameters by using SPSS.

842

843

844

845

846

847

848

849

850

Table 1. Demographics and clinical characteristics of COVID-19 patients.

|                                   | All patients (n=50) | Patients with PS(n=24) | Patients without PS(n=26) | P value |
|-----------------------------------|---------------------|------------------------|---------------------------|---------|
| <b>Gender (%)</b>                 |                     |                        |                           | 0.0438  |
| Female                            | 29(58.00%)          | 10(41.67%)             | 19(73.1%)                 | -       |
| Male                              | 21(42.00%)          | 14(58.33%)             | 7(26.9%)                  | -       |
| <b>Age</b>                        | 53.96±11.10         | 59.63±10.43            | 48.73±9.07                | 0.0003  |
| <b>SARS-Cov2 PCR Test (%)</b>     |                     |                        |                           |         |
| Negative                          | 50(100.00%)         | 24 (100.00%)           | 26 (100.00%)              | >0.9999 |
| <b>IgM/IgG antibody (%)</b>       |                     |                        |                           |         |
| IgM Positive                      | 4(8.00%)            | 2(8.33%)               | 2(7.69%)                  | >0.9999 |
| IgG Positive                      | 45(90.00%)          | 22(91.67%)             | 23(88.46%)                | >0.9999 |
| <b>Past Medical History (%)</b>   |                     |                        |                           |         |
| Hypertension                      | 10(20.00%)          | 7(29.17%)              | 3(11.5%)                  | 0.1642  |
| Diabetes Mellitus                 | 7(14.00%)           | 6(25.00%)              | 1(3.85%)                  | 0.0451  |
| Cardiopathy                       | 5(10.00%)           | 3(12.50%)              | 2(7.7%)                   | 0.6613  |
| <b>CT Findings (%)</b>            |                     |                        |                           |         |
| Ground Glass Opacity              | -                   | 24(100.00%)            | -                         | -       |
| Fiber Streak Shadow               | -                   | 21(87.50%)             | -                         | -       |
| Tractive bronchiectasis           | -                   | 8(33.33%)              | -                         | -       |
| Reticulation                      | -                   | 7(29.17%)              | -                         | -       |
| Bronchovascular bundle distortion | -                   | 5(20.83%)              | -                         | -       |
| <b>Laboratory Finding</b>         |                     |                        |                           |         |
| White blood cell                  | 5.71±1.54           | 6.28±1.57              | 5.17±1.33                 | 0.0097  |
| Neutrophil                        | 3.65±1.31           | 3.87±1.30              | 3.44±1.30                 | 0.2515  |
| Lymphocyte                        | 1.89±0.72           | 2.15±0.87              | 1.65±0.43                 | 0.0125  |
| Monocyte                          | 0.36±0.11           | 0.38±0.08              | 0.35±0.14                 | 0.2996  |
| Platelet                          | 219.50±58.17        | 217.40±66.51           | 221.50±50.53              | 0.8051  |
| Hemoglobin                        | 145.20±13.77        | 151.00±13.52           | 139.80±11.84              | 0.0030  |

852 Data are presented as mean  $\pm$  standard deviation (SD) and n/N (%), where N is the total number of patients with available data. P  
853 values comparing patients with PS and patients without PS are from Fisher's exact test, or unpaired 2-sided Student's t test.  
854 COVID-19: Coronavirus disease 2019; SARS-CoV-2: Severe acute respiratory syndrome coronavirus 2; CT: Computed tomography;  
855 Ig: Immune globulin; PCR: Polymerase chain reaction; PS: Pulmonary sequelae.

856

857

858

859

860

861

862

863

864

865

866

867

868

869

870

871

**Table 2. Univariate and multivariate logistic regression analyses of PS.**

|                     | Univariate logistic regression |        |       |         | Multivariate logistic regression |        |       |         |
|---------------------|--------------------------------|--------|-------|---------|----------------------------------|--------|-------|---------|
|                     | OR                             | 95% CI |       | P value | OR                               | 95% CI |       | P value |
|                     |                                | Low    | Up    |         |                                  | Low    | Up    |         |
| Age (year)          | 1.117                          | 1.043  | 1.197 | 0.002   |                                  |        |       |         |
| B cell (%)          | 0.590                          | 0.435  | 0.802 | 0.001   |                                  |        |       |         |
| CD8+CD27+CD62L+ (%) | 0.834                          | 0.754  | 0.922 | <0.001  | 0.738                            | 0.590  | 0.924 | 0.008   |
| CD8+CD27-CD62L- (%) | 1.083                          | 1.031  | 1.138 | 0.001   |                                  |        |       |         |
| NK (%)              | 1.090                          | 1.012  | 1.174 | 0.023   |                                  |        |       |         |
| CD4+KLRG1+ (%)      | 1.082                          | 1.016  | 1.153 | 0.015   |                                  |        |       |         |
| CD4+TIM-3+ (%)      | 1.082                          | 1.010  | 1.158 | 0.024   |                                  |        |       |         |
| CD8+CD57+ (%)       | 1.114                          | 1.047  | 1.185 | 0.001   |                                  |        |       |         |
| CD8+KLRG1+ (%)      | 1.122                          | 1.051  | 1.198 | 0.001   |                                  |        |       |         |
| CD8+TIM-3+ (%)      | 1.186                          | 1.055  | 1.332 | 0.004   |                                  |        |       |         |
| NK+CD57+ (%)        | 1.096                          | 1.033  | 1.164 | 0.003   | 1.181                            | 1.038  | 1.343 | 0.012   |
| NKT+TIM-3+ (%)      | 1.155                          | 1.043  | 1.279 | 0.005   |                                  |        |       |         |
| CD57+γδT (%)        | 1.105                          | 1.043  | 1.171 | 0.001   |                                  |        |       |         |
| KLRG1+γδT (%)       | 1.098                          | 1.034  | 1.165 | 0.002   |                                  |        |       |         |
| TIM-3+γδT (%)       | 1.196                          | 1.036  | 1.381 | 0.014   |                                  |        |       |         |
| NK+NKP30+ (%)       | 0.953                          | 0.912  | 0.996 | 0.031   |                                  |        |       |         |
| NK+NKP46+ (%)       | 0.930                          | 0.877  | 0.987 | 0.017   |                                  |        |       |         |
| NKT+NKB1+ (%)       | 0.939                          | 0.900  | 0.979 | 0.003   |                                  |        |       |         |
| NKB1+γδT (%)        | 0.920                          | 0.878  | 0.965 | 0.001   |                                  |        |       |         |
| NKP30+γδT (%)       | 1.049                          | 1.011  | 1.087 | 0.010   |                                  |        |       |         |
| CD4+IFN+ (%)        | 1.151                          | 1.038  | 1.276 | 0.008   |                                  |        |       |         |
| CD4+IL-17A+ (%)     | 1.550                          | 1.046  | 2.296 | 0.029   |                                  |        |       |         |
| CD8+IFN+ (%)        | 1.133                          | 1.057  | 1.215 | <0.001  |                                  |        |       |         |

|                                |       |       |       |        |       |       |       |       |
|--------------------------------|-------|-------|-------|--------|-------|-------|-------|-------|
| CD4+GZMB+ (%)                  | 1.118 | 1.016 | 1.230 | 0.022  |       |       |       |       |
| CD4+Perforin+ (%)              | 1.112 | 1.009 | 1.226 | 0.033  | 1.153 | 0.953 | 1.396 | 0.143 |
| CD8+GZMB+ (%)                  | 1.089 | 1.038 | 1.142 | <0.001 |       |       |       |       |
| CD8+Perforin+ (%)              | 1.083 | 1.033 | 1.135 | 0.001  |       |       |       |       |
| NK+GZMB+ (%)                   | 1.113 | 1.040 | 1.192 | 0.002  |       |       |       |       |
| NK+Perforin+ (%)               | 1.304 | 1.128 | 1.507 | <0.001 |       |       |       |       |
| GZMB+ $\gamma\delta$ T (%)     | 1.054 | 1.012 | 1.097 | 0.012  |       |       |       |       |
| Perforin+ $\gamma\delta$ T (%) | 1.067 | 1.018 | 1.118 | 0.007  |       |       |       |       |
| CD27+ $\gamma\delta$ T (%)     | 0.938 | 0.896 | 0.982 | 0.006  |       |       |       |       |

---

873

874

875

876

877

878

879

880

881

882

883

884 **FIG 1**

885

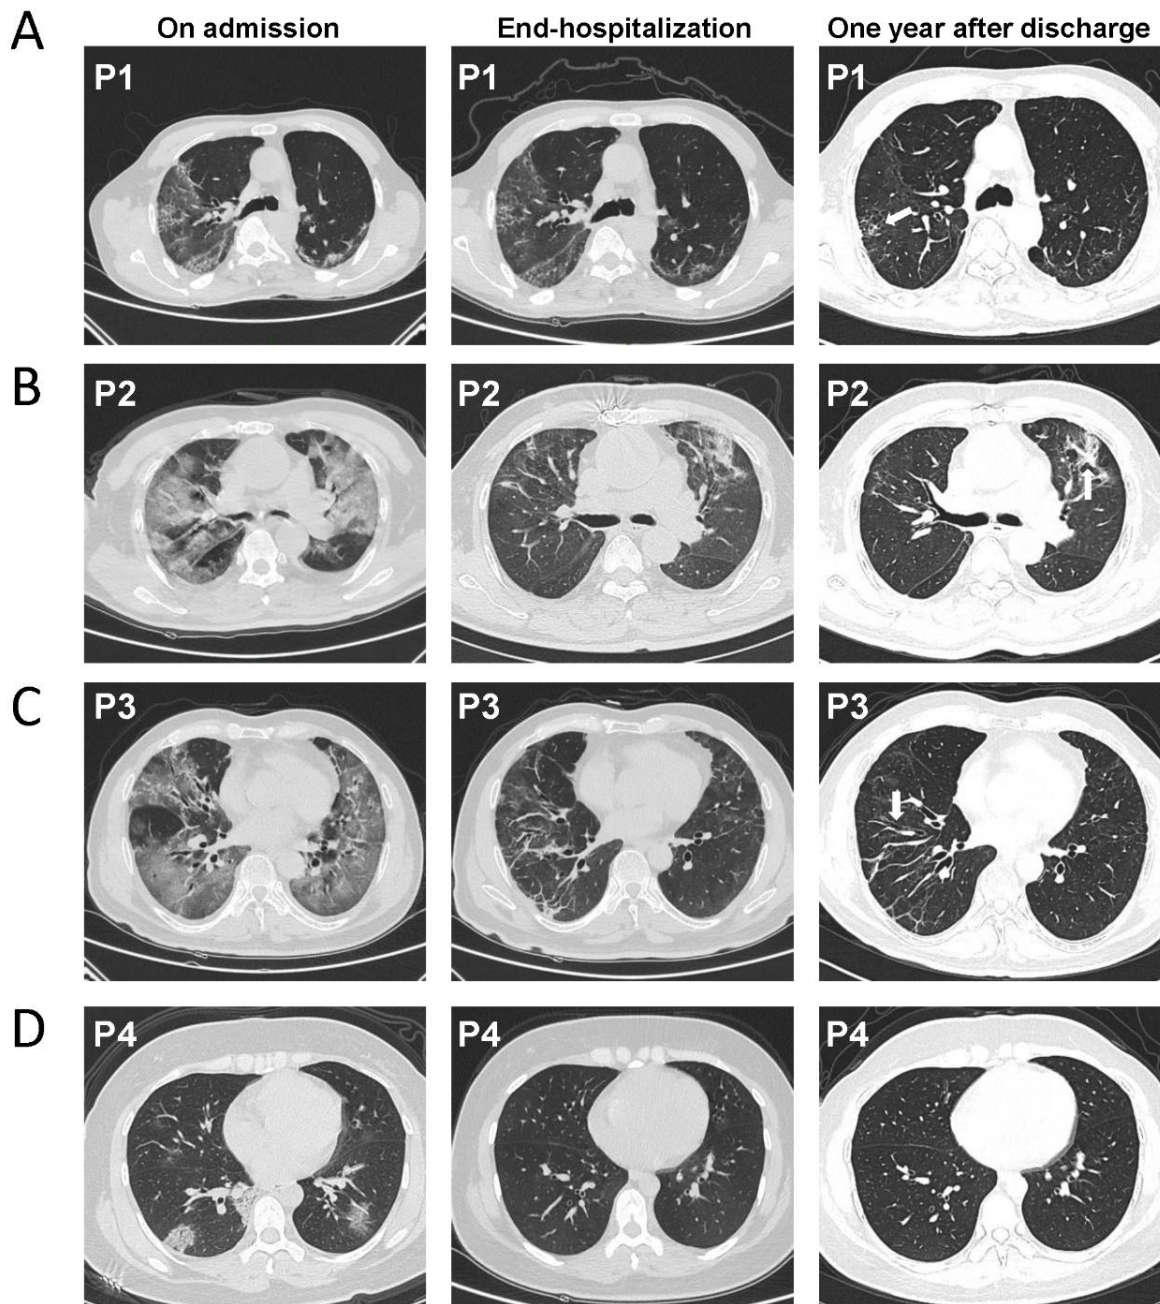

886

887

888

889

890

891

892

893

894 **FIG 2**

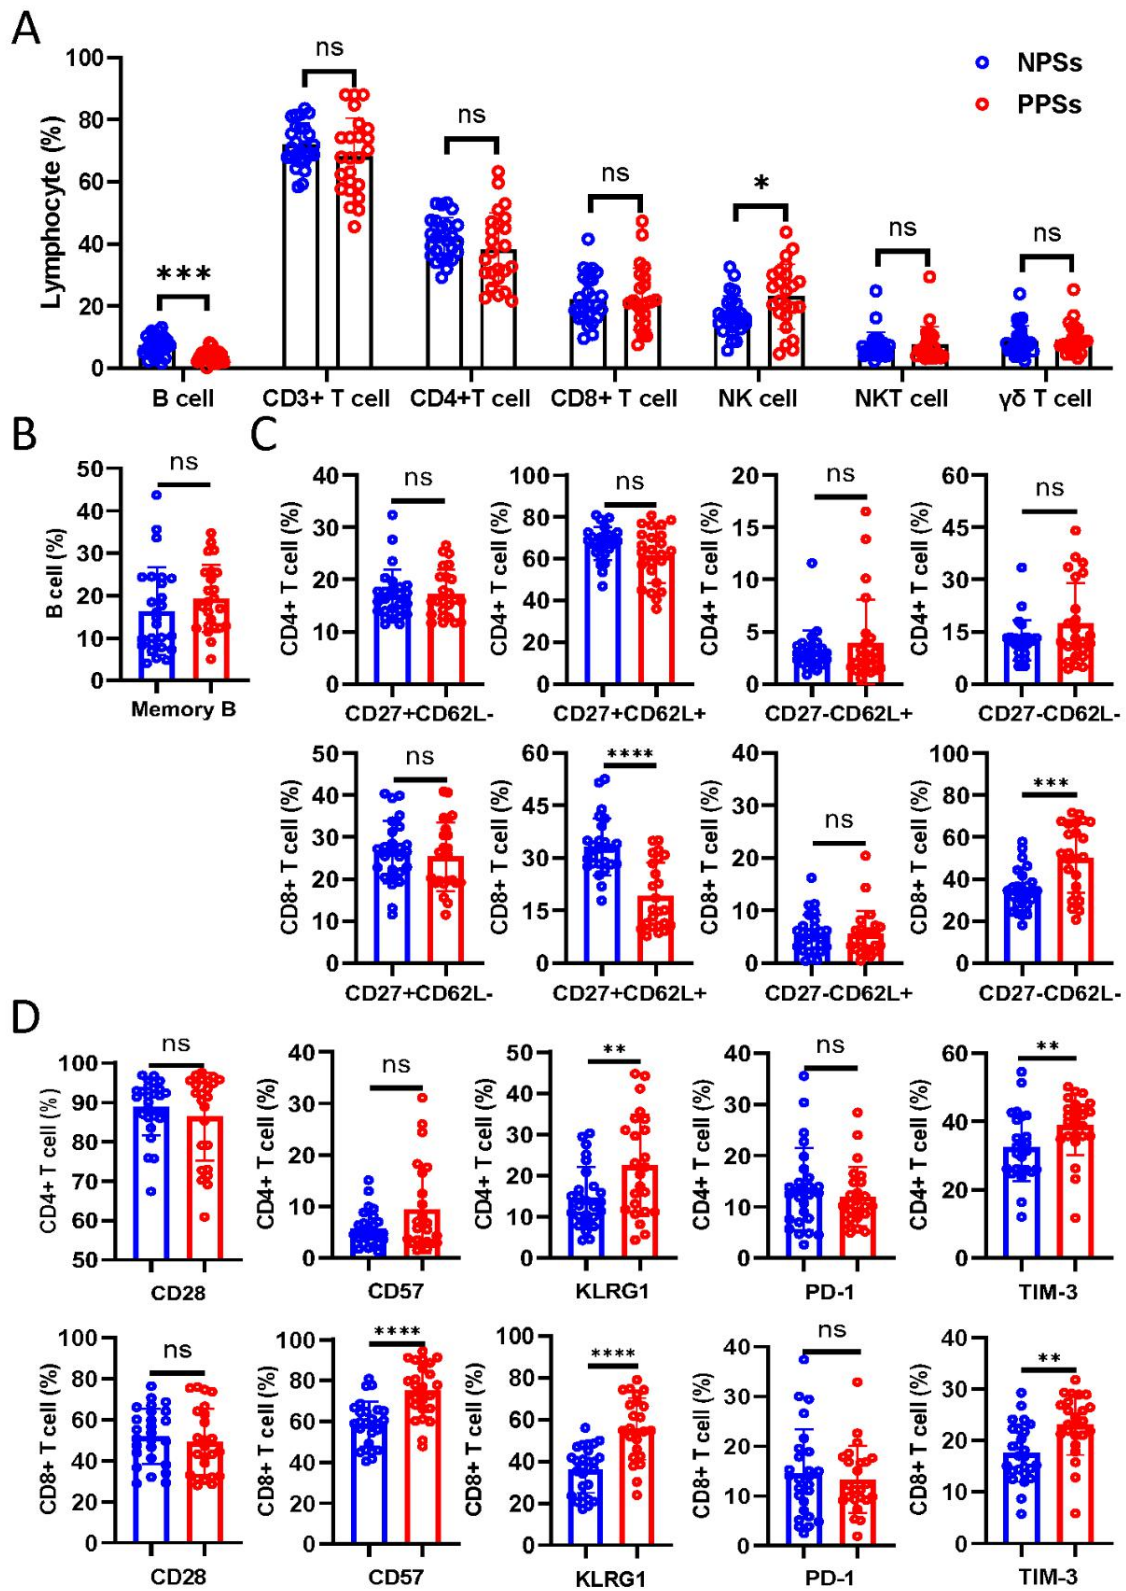

895

896

897



898 **FIG 3**

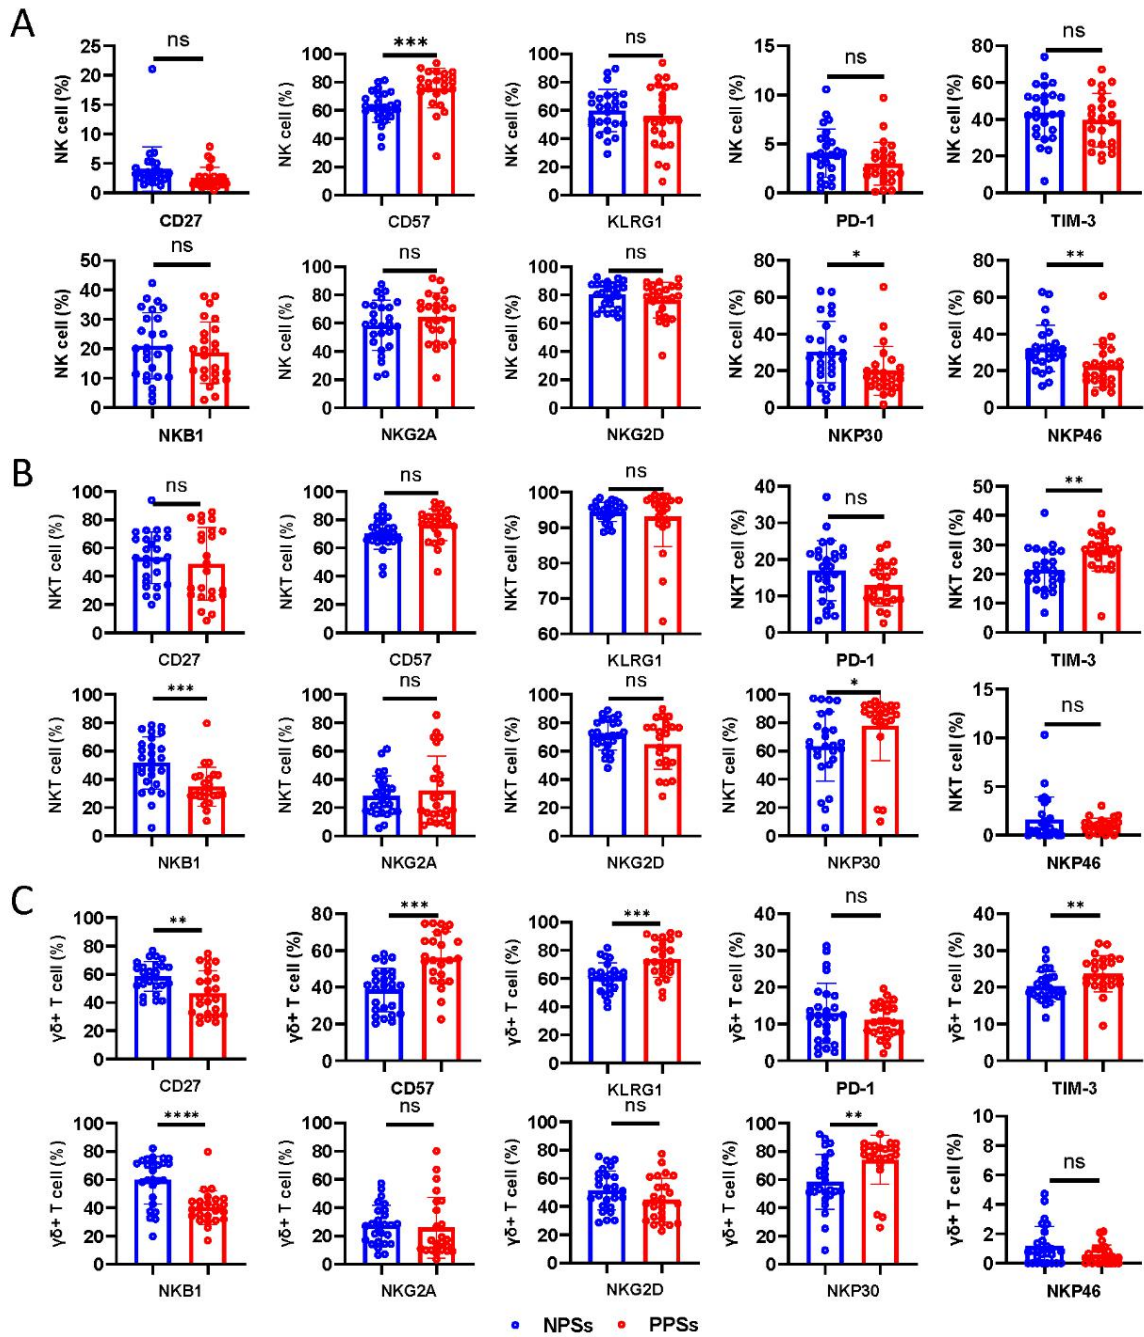

899

900

901

902

903

904

905

906

907 **FIG 4**

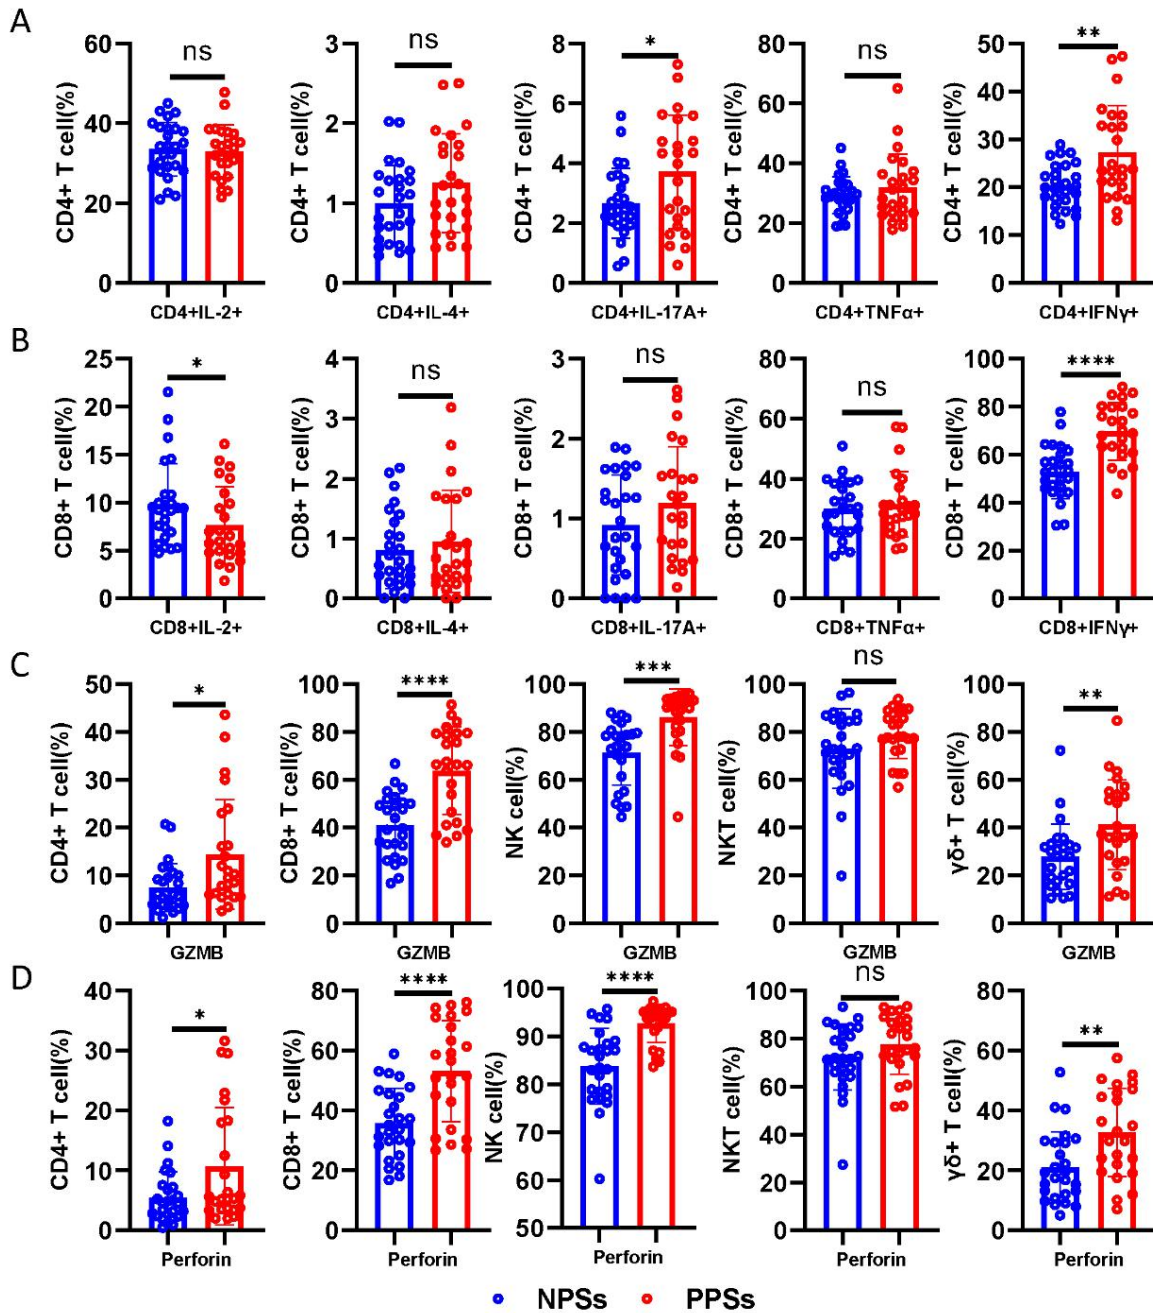

908

909

910

911

912

913

914

915

916

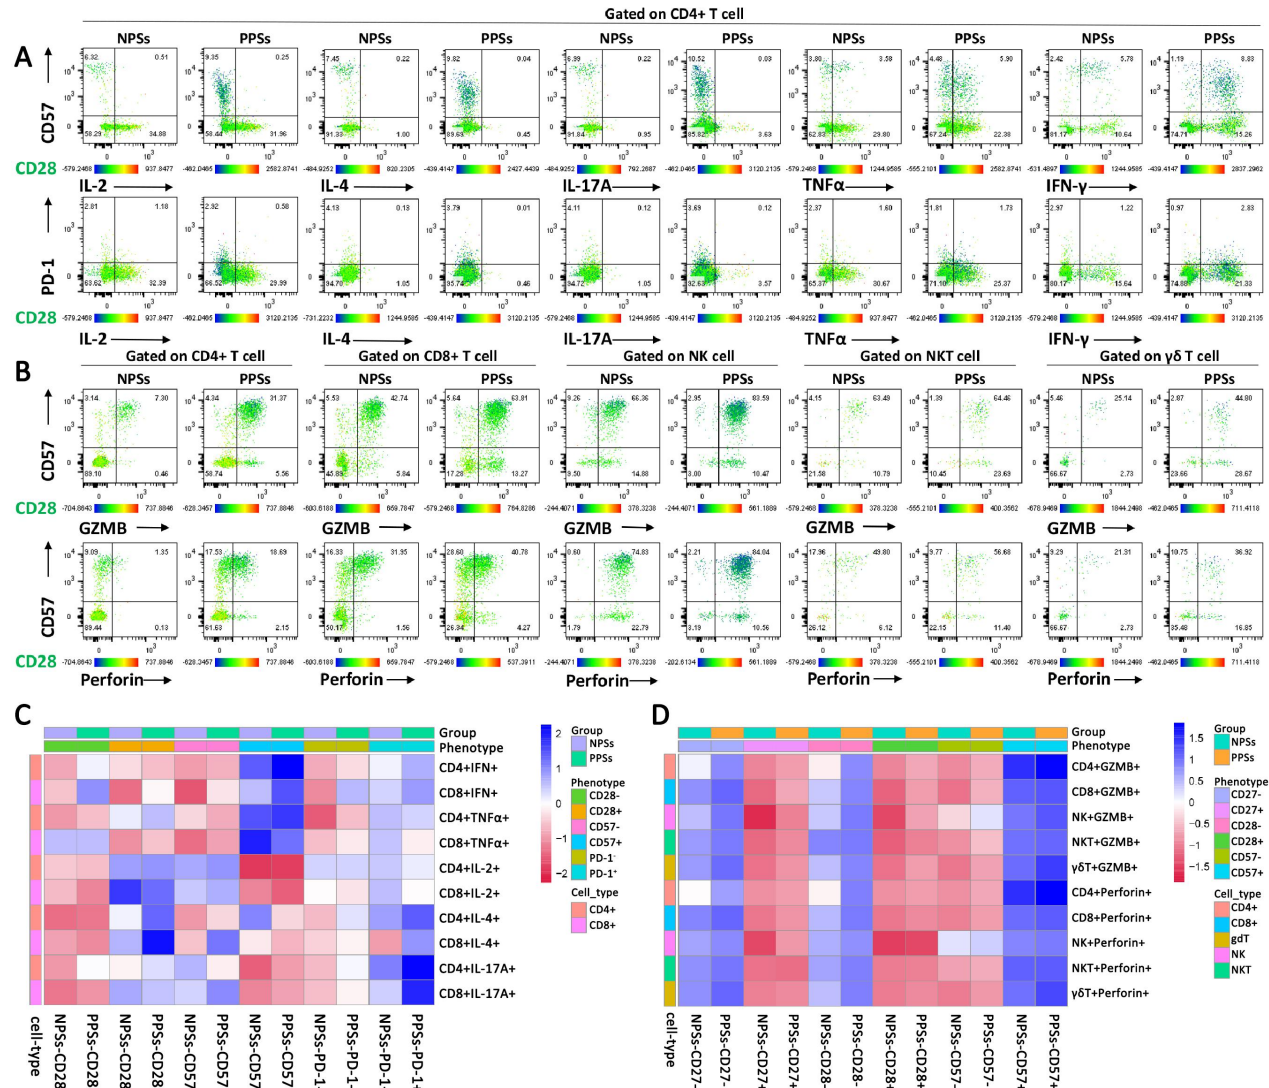

918 **FIG 6**

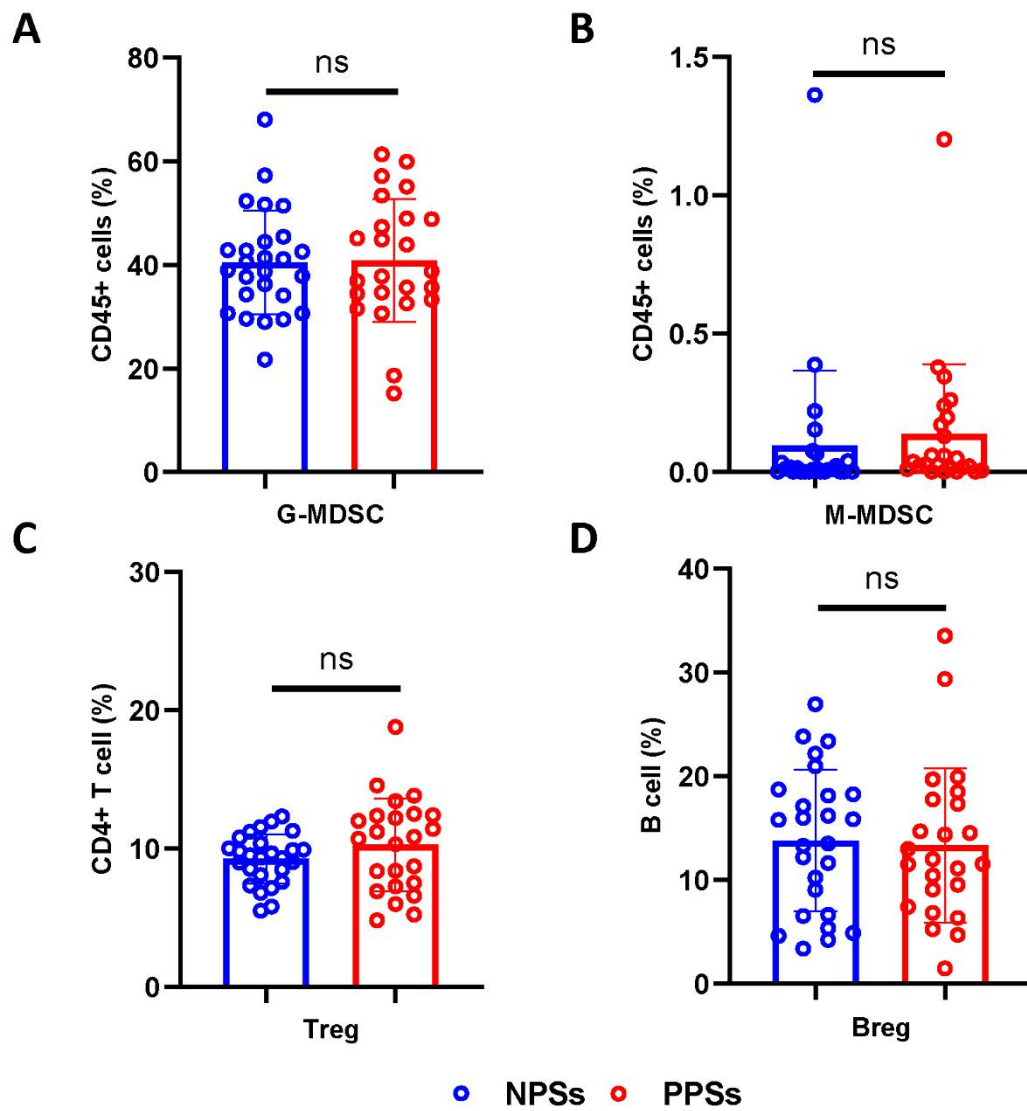

919

920

921

922

923

924

925

926

927

928

929

930

931



933

934

935

936

937

938

939

940

941

942

943

944

945

946

947

948

949

950

951

952
